1      **SLFL Genes Participate in the Ubiquitination and Degradation of S-RNase in**

2                                      **Self-compatible Chinese Peach**

3      Qiuju Chen<sup>1, §</sup>, Dong Meng<sup>1, 2, §</sup>, Wei Li<sup>1</sup>,    Zhaoyu Gu<sup>1</sup>, Hui Yuan<sup>1</sup>, Xuwei Duan<sup>1</sup>,

4      Qing Yang<sup>1</sup>, Yang Li<sup>1</sup>, Tianzhong Li<sup>1\*</sup>

5      **Author Affiliations:**

6      <sup>1</sup>Laboratory of Fruit Cell and Molecular Breeding, College of Agronomy and Bio-tech,

7      China Agricultural University, Beijing 100193, China;

8      <sup>2</sup>Present address: Section of Horticulture, School of Integrative Plant Science, Cornell

9      University, Ithaca, NY-14850, USA.

10      <sup>§</sup>These authors contributed equally to this work.

11      \* Corresponding author: litianzhong1535@163.com

12

13

14

15    **Title**

16    ***SLFL* Genes Participate in the Ubiquitination and Degradation of S-RNase in**  
 17    **Self-Compatible Chinese Peach**

18

19    **Abstract**

20    The gametophytic self-incompatibility (SI) mediated by S-RNase of Rosaceae,  
 21    Solanaceae and Plantaginaceae, is controlled by two tightly linked genes located at  
 22    highly polymorphic S-locus: the S-RNase for pistil specificity and the F-box gene  
 23    (SFB/SLF) for pollen specificity, respectively. The F-box gene of peach (*Prunus*  
 24    *persica*) is S haplotype-specific F-box (*SFB*). In this study, we selected 37  
 25    representative varieties according to the evolution route of peach and identified their S  
 26    genotypes. We cloned pollen determinant genes mutant *PperSFB1m*, *PperSFB2m*,  
 27    *PperSFB4m* and normal *PperSFB2*, and style determinant genes *S1-RNase*, *S2-RNase*,  
 28    *S2m-RNase* and *S4-RNase*. Mutant *PperSFBs* were translated terminated prematurely  
 29    because of fragment insertion. Yeast two-hybrid showed that mutant *PperSFBs* and  
 30    normal *PperSFB2* interacted with all S-RNases. Normal *PperSFB2* was divided into  
 31    four parts: box, box-V1, V1-V2 and HVa-HVb. Protein interaction analyses showed  
 32    that the box portion did not interact with S-RNases, both of the box-V1 and V1-V2  
 33    had interactions with S-RNases, while the hypervariable region of *PperSFB2*  
 34    HVa-HVb only interacted with S2-RNase. Bioinformatics analysis of peach genome  
 35    revealed that there were other F-box genes located at S-locus, and of which three  
 36    F-box genes were specifically expressed in pollen, namely *PperSLFL1*, *PperSLFL2*

37 and *PperSLFL3*, respectively. Phylogenetic analysis showed that PperSFBs and  
 38 PperSLFLs were classified into two different clades. Yeast two-hybrid analysis  
 39 revealed that as with PperSFBs, the three F-box proteins interacted with PperSSK1.  
 40 Yeast two-hybrid and BiFC showed that PperSLFLs interacted with S-RNases with no  
 41 allelic specificity. In vitro ubiquitination assay showed that PperSLFLs could tag  
 42 ubiquitin molecules to PperS-RNases. In all, the above results suggest that three  
 43 *PperSLFLs* are the appropriate candidates for the ‘general inhibitor’, which would  
 44 inactivate the S-RNases in pollen tubes, and the role of three PperSLFL proteins is  
 45 redundant, as S-RNase repressors involved in the self-incompatibility of peach.

46

47 **Key words:** Chinese peach, self-compatibility, S-locus F-box like gene (*SLFL*),  
 48 S-RNase, ubiquitination, SCF complex

49

## 50     **Introduction**

51           Self-incompatibility (GSI) is the most widely distributed breeding system that  
52     allows the pistil to reject genetically related pollen and promotes out-crossing in  
53     flowering plants (de Nettancourt, 2001). Many species in Solanaceae, Rosaceae, and  
54     Plantaginaceae exhibit S-RNase-based GSI which is controlled by the complex  
55     S-locus which contains at least two genes, one gene is pistil-part, a highly  
56     polymorphic *S* gene encoding extracellular ribonuclease called S-RNase, and one is  
57     pollen-part specific *S* gene, which is tightly linked to the S-RNase. The tightly linked  
58     genetic unit of the pistil *S* allele (S-RNase) and pollen *S* allele is called *S* haplotype.  
59     The pollen *S* genes of the S-RNase-based GSI of the above three families are F-box  
60     genes called *SLF/SFB* (Entani et al., 2003; Lai et al., 2002; Sijacic et al., 2004;  
61     Ushijima et al., 2003; Yamane et al., 2003). The pollen *S* gene was called *SLF* (*S*  
62     locus F-box) in Solanaceae and Plantaginaceae and *SFB* (*S* haplotype-specific F-box)  
63     in *Prunus* (Sassa et al., 2010; Tao and Iezzoni, 2010; Meng et al., 2011). S-RNase is  
64     secreted into style transmitting intercellular space, and non-selectively taken up into  
65     cytoplasm of compatible and incompatible pollen tubes elongating in style tissues,  
66     and pollen tube elongation is arrested in incompatible crosses, probably because of  
67     cytotoxic effects of self S-RNase (Luu et al., 2000; Goldraij et al., 2006; McClure et  
68     al., 2011; Boivin et al., 2014). The predominant role of F-box proteins is  
69     ubiquitination of proteins, thus possibly *SLF/SFB* acts as a subunit to generally  
70     constitute the SCF complex, an E3 ubiquitin ligase, discriminates between self and  
71     non-self S-RNase, and mediate the ubiquitination of non-self S-RNases for

72 degradation by the 26S proteasome (Lechner et al., 2006; Franklin-Tong, 2008; Hua  
73 et al., 2008). In this process, how F-box proteins discriminate self and non-self  
74 S-RNases in pollen tubes is unknown.

75 A single S-locus F-box gene is known as *SFB* identified in *Prunus* (Entani et al.,  
76 2003; Ushijima et al., 2003; Sonneveld et al., 2005), while multiply *F-box* genes  
77 located at the S-locus have been cloned in subtribe Maloideae designated as *F-box*  
78 *brothers* (Sassa et al., 2007; Kubo et al., 2010; Kakui et al., 2011). In subfamily  
79 Maloideae (e.g., apple and pear) of Rosaceae, polyploidization breaks SI in pollen but  
80 does not affect the pistil (de Nettancourt, 2001). The pistil of ‘Fertility’ (2x) could  
81 accept pollen from autotetraploid (4x), but ‘Fertility’ (2x) pollen was rejected by the  
82 pistil of autotetraploid (4x) (Crane and Lewis, 1942). Genetic analyses reveal that the  
83 breakdown of SI can be explained by ‘competition’ between different S alleles in  
84 pollen. But in *Prunus* (subfamily Prunoideae), tetraploidy is not always associated  
85 with SC. Sour cherry (*Prunus cerasus*) is a naturally occurring tetraploid species and  
86 includes both SI and SC plants (Lansari and Iezzoni, 1990). Genetic analysis of SI  
87 sour cherry suggested that heteroallelic diploid pollen tubes are rejected by pistils  
88 with cognate S haplotypes (Hauck et al., 2006). Hauck et al. (2006) proposed that the  
89 breakdown of SI in tetraploid sour cherry is caused by the accumulation of  
90 non-functional S haplotypes and not by competitive interaction in heteroallelic pollen.  
91 In Japanese pear,  $S^{4sm}$  pollen lacking  $SFBB1-S^4$  are rejected by compatible  $S^1$  pistils  
92 but accepted by  $S^3$  and  $S^5$  pistils (Okada et al., 2004 ;Okada et al., 2008). On the other  
93 hand, loss-of-function of  $SFBB1-S^5$  had no effect on SI phenotype. Genetic analysis

reveals that  $S^5$  pollen is normally accepted by  $S^1$ ,  $S^3$  and  $S^4$  pistils (Sassa et al., 2011). The previous fruit set analyses shows that  $S^5$  pollen is normally compatible with  $S^2$  and  $S^9$  pistils and incompatible with  $S^5$  pistils (Kajiura et al., 1967; 1969; 1974). On the contrary, in *Prunus*, a truncated SFB protein or lacked the SFB gene can confer pollen-part self-compatibility (SC) (Ushijima et al., 2004; Sonneveld et al., 2005; Hauck et al., 2006; Tsukamoto et al., 2006). These findings suggest that S-RNase-based GSI seems to consist of two types in which the mode of action of pollen S is different, a ‘self recognition by a single factor’ system and a ‘non-self recognition by multiple factors’ system (Kakui et al., 2011), and the S-RNase-based GSI of *Prunus* represents ‘self recognition by a single factor’, in which the cytotoxic effect of non-self S-RNases in pollen tubes is inactivated by a ‘general inhibitor’ while the self S-RNase is specifically protected by a ‘blocker’ molecule and degrades RNA of self-pollen to arrest tube growth (Luu et al., 2001; Sonneveld et al., 2005). Although the ‘general inhibitor’ is a hypothetical protein and had been considered to be SLFLs in *Prunus avium* (Matsumoto and Tao, 2016), and in peach, whether the ‘general inhibitor’ is SLFLs as with in *Prunus avium* needs to be studied.

Skp1, Cullin1 (Cul1), Rbx1 and F-box proteins together constitute the SCF complex, E3 ubiquitin ligases. The E3 ubiquitin ligase can make substrate proteins polyubiquitination to degrade by the 26s proteasome system. In the SCF complex, the F-box protein determines substrate specifically, Skp1 serves as an adaptor to connect the variable F-box protein and Cul1 protein, Cul1 forms a core catalytic scaffold with Rbx1, and Rbx1 can bind to E2 and catalyzes the transfer of ubiquitin chains from E2

116 to the substrate protein to make ubiquitination of substrate proteins (Wu et al., 2000;  
117 Zheng et al., 2002; Deshaies and Joazeiro, 2009). SLF/SFBB is shown to be a  
118 compoment of the SCF complex to detoxified non-self S-RNases. In petunia, SLF was  
119 showed to form the SCF complex with Skp1-like and Cul1-p in pollen(Zhao et al.,  
120 2010; Entani et al., 2014; Liu et al., 2014), and in Maloideae, SFBB was also shown  
121 to form SCF complex which targeted selectively S-RNase and polyubiquitinated it in  
122 vitro (Yuan et al., 2014).

123 In our study, we selected 37 representative species according to the evolution  
124 route of peach, and identified their S genotypes. Through yeast two-hybrid and BiFC  
125 analysis, we found that PperSFB2 distinguished self S2-RNase from non-self  
126 S-RNases by the C-terminal hypervariable region. According to the genome wide  
127 analysis, we cloned three *SLFL* genes in the *S*-locus on chromosome 6, and did some  
128 experiments and analysis to determine whether the function of the *SLFL* genes is the  
129 same as that of *Prunus avium*. Our results showed that PperSLFL proteins were in  
130 different clade compared with PperSFB proteins, and could participate in  
131 self-incompatibility of peach as a subunit of SCF complex.

132

## 133 **Materials and Methods**

### 134 **Plant Material**

135 37 peach varieties (Supplemental Table 1) were selected from the Zhengzhou  
136 Fruit Research Institute, Chinese Academy of Agricultural Sciences, Henan Province,  
137 China. Peach organs/tissue samples (leaves, styles and pollen) were collected, frozen

138 in liquid nitrogen and stored at -80°C Ultra-low temperature refrigerator for later use.

139

## 140 **DNA and RNA Extraction**

141 Peach genomic DNA was isolated from young leaves using the CTAB method  
142 (Li et al., 2009), and incubated with RNase I (Invitrogen, CA, USA) at 37°C for 2  
143 hours to remove RNA. Total RNA samples were isolated from leaves, styles and  
144 pollen using a modified CTAB method (Li et al., 2009) and treated with DNase I  
145 (Invitrogen, CA, USA) to remove DNA contamination. RNA was used as template to  
146 synthesize first-strand cDNA using the SuperScript reverse transcriptase (Invitrogen,  
147 CA, USA) and Oligo-dT primers (According to manufacturer's instructions,  
148 Invitrogen, CA, USA).

149

## 150 **PCR for S Genotype Analysis**

151 Peach genomic DNA was used as templates for PCR with the primers listed in  
152 Supplemental Table 2. The primers were designed according to the length of the  
153 second intron of the *S*-RNases. The different *S*-RNases and *S* genotypes of peach  
154 varieties could be distinguished depending on the size of the amplified fragments.

155

## 156 **Cloning of *PperS-RNases*, *PperSFBs*, *PperSLFLs*, *PperSSK1*, *PperCUL1* and** 157 ***PperRbx1***

158 Pollen cDNA was used as template to clone, *PperSFBs*, *PperSLFLs*, *PperSSK1*,  
159 *PperCUL1* and *PperRbx1* and style cDNA was used as template to clone



160 *PperS-RNases* with the gene specific primers listed in Supplemental Table S2. The  
 161 PCR products were purified and individually ligated to the pMD19T-simple vector  
 162 (TaKaRa).The constructed vectors were transformed into *E. coli* competent DH5α  
 163 cells (Transgene biotech, Beijing, China). Each gene selected 3 positive clones for  
 164 sequencing.

165

# **166 Tissue-specific expression analysis**

167 cDNA samples synthesized from total RNA from leaves, styles and pollen of the  
 168 37 peach varieties included in this study were used as templates to analyze  
 169 tissue-specific expression of *PperS-RNases*, *PperSFBs* and *PperSLFLs*. Gene specific  
 170 primers were designed and listed in Supplemental Table S2, and an actin gene was  
 171 used as an internal control for constitutive expression with the following thermal  
 172 cycling condition: a denaturation step at 94°C for 5 min followed by 30 cycles of  
 173 95°C for 30 s, 60°C for 30 s. 72°C for 30, and then 72°C for 10 mins.

174

# **175 Construction of the phylogenetic tree of F-box, CUL1 and SSK1**

176 64 CDSs of S-locus F-box genes from *Malus domestica*, *Pyrus pyrifolia*, *Pyrus*  
 177 *bretschneideri*, *Prunus avium*, *Prunus dulcis*, *Prunus mume*, *Prunus salicina*, *Prunus*  
 178 *armenica* were used to construct phylogenetic trees with the f-box genes specifically  
 179 expressed in pollen cloned from 37 peach varieties in this study. The deduced amino  
 180 acid sequences of Skp1-like proteins and cullin-like proteins from *Arabidopsis*  
 181 *thaliana*, *Antirrhinum hispanicum*, *Prunus tenella*, *Petunia integrifolia*, *Pyrus*

182 *bretchneideri*, *Malus domestica*, *Prunus avium*, *Prunus persica*. *Petunia integrifolia*,  
183 *Vitis vinifera*, *Nicotiana tabacum*, *Prunus tomentosa* and *Prunus mume* were aligned  
184 by CLUSTALW. Based on the alignment, phylogenetic trees were constructed by the  
185 neighbor-joining method (Saitou and Nei, 1987) using MEGA 6.0 program with the  
186 neighbor-joining method and the bootstrap test replicated 1000 times. The confidence  
187 values were shown on the branches.

188

### 189 **Yeast Two-hybrid (Y2H) Analysis**

190 Yeast transformation and activity of  $\beta$ -galactosidase assays were performed  
191 following the manufacturer's instructions (Clontech, CA, USA). The partial CDSs of  
192 *PperS-RNases* removed signal peptide and the full-length CDSs of *PperSSK1* and  
193 *PperCUL1* were cloned into pGBKT7 vector (Clontech), whereas the full-length  
194 CDSs of *PperSFBs*, *PperSLFLs*, *PperSSK1* and *PperRbx1* were cloned into pGADT7  
195 vector (Clontech).

196 In order to find out the reason that *PperSFB* differentiates between self S-RNase  
197 and non-self S-RNases, Normal *PperSFB2* was divided into four parts: box, box-V1,  
198 V1-V2 and HVa-HVb and cloned them into pGADT7 vectors. Yeast two-hybrid assay  
199 was performed to observe the interactions between different portions of *PperSFB2*  
200 and all *PperS-RNases* in this study.

201 For the Y2H assay, AH109 cells containing both AD and BD plasmids were  
202 grown on SD/-Leu/-Trp medium for 3 d at 30°C. Ten independent clones for each  
203 combination were streaked on SD/-adenine/-His/-Leu/-Trp medium and grown for 3-4

204 d at 30 °C. Then use X- a-gal (TaKaRa Bio) to dye the clones to determine if there  
205 were interactions between the combinations. For quantitative measurements,  
206  $\beta$ -galactosidase activity was determined using o-nitrophenyl- $\beta$ -D-galactopyranoside  
207 (Sigma Aldrich) as a substrate according to Hao J. (2009) described.

208

## 209 **Bimolecular fluorescence complementation (BiFC) analysis**

210 The pCambia1300 vector was used to construct BiFC vectors, which contained  
211 the N- or C-terminal of yellow fluorescence protein (YFP) fragments (YFPN and  
212 YFPC), respectively. The full-length CDSs of *SLFLs* without stop codon were cloned  
213 into pCambia1300-YFPN vectors, whereas the partial CDSs of S-RNases without stop  
214 codon removed signal peptide were cloned into pCambia1300-YFPC. All the  
215 construct vectors were transformed into *Agrobacterium tumefaciens* GV3101 and  
216 co-infiltrated into *Nicotiana Benthamiana* leaves. Fluorescence was observed in  
217 epidermal cell layers after 5 days by Olympus BX61 fluorescent microscope  
218 (Olympus FluoView FV1000).

219 The box, box-V1, V1-V2 and HVa-HVb frames without the stop codon were  
220 amplified and cloned into the pCambia1300-YFPN vectors. The recombinant  
221 plasmids containing the *box-YFPN*, *box-V1-YFPN*, *V1-V2-YFPN* or *HVa-HVb-YFPN*  
222 fusion gene and *PperS1-RNase*, *PperS2-RNase*, *PperS2m-RNase* or *PperS4-RNase*  
223 removed signal peptide fusion gene and the control plasmid with *YFPN* and *YFPC*  
224 were co-transformed into maize (*Zea mays* Linn.Sp.) protoplasts respectively  
225 according to Ren et al. (2011). GFP fluorescence was observed by Olympus BX61

226 fluorescent microscope (Olympus FluoView FV1000).The primers used were listed in  
227 (Supplemental Table 2).

228

## 229 **Purification of Peptide Tagged Recombinant Proteins**

230 His-tagged proteins were purified as previously described (Meng et al., 2014).

231 The mature peptide of the S-RNases without signal peptide were cloned into the  
232 pEASY-E1 vector (From TransGen Biotech Company) and transformed into the *E.*

233 *coli* strain BL21 plysS (DE3) (From TransGen Biotech Company). The cells were

234 inoculated into LB medium containing 100μg/ml ampicillin and incubated for about

235 3h at 37 °C in a shaker at 200 rpm. Once the cell suspension OD<sub>600</sub> reached about 0.5,

236 isopropyl β-D-1-thiogalactopyranoside (IPTG) was added into medium with final

237 concentration of 0.2 mM to induce protein expression. The cell suspension was

238 incubated for 10-12 h at 16°C in the shaker at 180rpm. His-tagged fusion proteins

239 were purified using Ni-NTA His Binding resin (Novagen, USA) as previously

240 described (according to the manufacturer's instructions of Ni-NTA His Bind Resins,

241 Novagen). The full-length coding sequences of pollen-expressed *PperSFB1m*,

242 *PperSFB2m*, *PperSFB2*, *PperSFB4m* *PperSLFL1*, *PperSLFL2* and *PperSLFL3* were

243 cloned into pMAL-c5x vector, which is designed to generate maltose-binding protein

244 (MBP) fusion proteins. Similarly, the *PperCUL1*, *PperSSK1* and *PperRbx1* were

245 cloned into pGEX4T-1 vector, which is designed to produce glutathione S-transferase

246 (GST) fusion proteins. All the GST-fusion proteins and MBP-fusion proteins were

247 purified using glutathione resin and maltose, as previously described (Yuan et al.,

248 2014).

249

## 250 ***In Vitro* Ubiquitination Analysis of S-RNase**

251 *In vitro* ubiquitination assays were performed as previously described (Yang et  
252 al., 2009; Yuan et al., 2014). The reaction mixture containing 50 mM Tris (pH 7.4), 10  
253 mM MgCl<sub>2</sub>, 2 mM dithiothreitol (DTT), 5 mM HEPES, 2 mM adenosine triphosphate  
254 (ATP), 0.05% Triton X-100, 10 mM creatine phosphate, 1 unit of phosphokinase, 10  
255 µg ubiquitin, 50 nM E1 (UBA6, *Petunia hybrida*), 1 mM PMSF, 850 nM E2 (UBH6,  
256 *P. hybrida*), and aliquots of the recombinant proteins GST-PpSSK1, GST-CUL1,  
257 GST-Rbx1 and any MBP-SLFL at 30 °C for 2 h. Mixtures were immunoblotted using  
258 an anti-S-RNase antibody (From Beijing ComWin Biotech Company).

259

## 260 **Results**

### 261 **Identification of *PperS-RNase* and *PperSFB* alleles in 37 Chinese peach varieties**

262 For this study, we collected 37 Chinese peach varieties which represent local  
263 cultivars in 18 provinces/municipalities in China (Supplemental Table 1). These are  
264 thought to represent the evolutionary paths from the origin in central China (Tibet,  
265 Yunnan and Guizhou provinces) to the northwest of China (Shanxi province), then to  
266 the southwest of China and finally to the coastal and Xinjiang provinces (Cao et al.,  
267 2014) (Supplemental Fig. S1). Only four *S*-haplotypes *S*1, *S*2, *S*2m and *S*4, were  
268 detected from 36 peach varieties except Guang He Tao (Supplemental Fig. S2)  
269 (Supplemental Table 1), and they had previously been reported (Tao et al. 2007). The

270 *S* genotype of 18 varieties, including Da Hong Pao, were *S2S2* genotype and 9  
271 varieties, including Hunchun Tao, were *S1S2* genotype, while 3 varieties were of the  
272 *S2S4* genotype (Feicheng Bai Li 10, Feicheng Bai Li 17 and Feicheng Hong Li 6)  
273 (Supplemental Table 1). The *S2-RNase* in 6 varieties was observed to contain a  
274 nucleotide substitution (G→A), which results in the conversion of the sixth conserved  
275 cysteine residue to a tyrosine in the *Prunus* C5 domain (Fig. 1A). This was named as  
276 *S2m-RNase*. *S2-RNase* and *S2m-RNase* were also identified from the original species  
277 Guang He Tao, which indicating that the mutation of *S2-RNase* had occurred before  
278 the formation of Chinese peach cultivars. Interestingly, we found that two *S-RNases*  
279 cloned from Guang He Tao lacked two introns (Fig. 1A). The 4 *S-RNases* were only  
280 expressed in pistil (Fig. 1D).

281 The mutated *PperSFBs* cloned from all varieties in this study were the same as  
282 previously reported mutations, but we found that the sequence of inserted 155 bp  
283 fragment in *PperSFB1m* was the same as the sequence of 155 bp fragment upstream  
284 of the insertion point, and the sequence of 5bp insertion in *PperSFB2m* was also the  
285 same as the 5 bases upstream of the insertion point. The sequences of 351 bp at both  
286 ends of the inserted 4949 bp fragment in *PperSFB4m* were also the same (Fig 1B).  
287 The mutant repeat sequences of *PperSFB4m* had previously been reported (Toshio et  
288 al., 2014). In addition, except the mutated *SFB2m*, a canonical *SFB2* gene was cloned  
289 from Guang He Tao, indicating that peach mutations occurred prior to evolution and  
290 the canonical *SFB2* was eliminated during the selection process. The expression of  
291 *SFBs* was pollen-specific (Fig. 1D).

292

293 **Cloning and expression analysis of *PperSLFL* and SCF complex (*PperCUL1*,**  
 294 ***PperSSK1* and *PperRbx1* genes)**

295 According to the sequences of *S-locus F-box-likes (SLFLs)* in peach genome  
 296 (Genome Database for Rosaceae, <http://www.rosaceae.org/>), the primers were  
 297 designed to clone the six *SLFL* genes. Finally, only three *SLFL* genes were cloned  
 298 from pollen cDNA and their expression was pollen-specific (Fig. 1D). We named the  
 299 three F-box genes as *PperSLFL1*, *PperSLFL2* and *PperSLFL3*, respectively.  
 300 *PperSLFL1* located at about 47kb downstream of *PperS2-RNase* and the translation  
 301 direction was opposite to that of *S2-RNase*; *PperSLFL2* located at about 26kb  
 302 downstream of *S2-RNase* and *PperSLFL3* located at about 1.3kb upstream of  
 303 *S2-RNase*, and the translation directions of the both F-box genes were the same as that  
 304 of *S2-RNase*. The three *PperSLFL* genes did not have introns (Fig. 1C). The  
 305 *PperSLFL1* and *PperSLFL2* showed pollen-specific expression, similar to the  
 306 *PperSFB* genes. Despite the fact that *PperSLFL3* transcripts were detected in both  
 307 leaves and styles, its expression was the most in pollen (Fig. 1D). The identity of the  
 308 predicted amino acid sequences of *PperSLFL1*, *PperSLFL2* and *PperSLFL3* was  
 309 52.45%, while the alignment of the predicted amino acid sequences of *PperSLFL1*  
 310 with *PperSLFL2* and *PperSLFL3*, respectively, the identity was 31.33% and 31.72%,  
 311 respectively. The 3 *PperSLFL* genes showed low sequence identity with each other  
 312 and with *PperSFB*. All the *PperSLFL* proteins contained the basic F-box domain and  
 313 the FBA domain (Fig. 2). The phylogenetic tree analysis showed the three *PperSLFL*

genes of peach clustered together with other *Prunus SLFL* genes, which was reported previously (Tao et al., 2008). The phylogenetic tree had two large lineages; the *Prunus SFB* genes did not cluster together with the pollen S genes of *Pyrus* and *Malus* and diverged into a separate lineage. *Pyrus* and *Malus SFBs* and *Prunus SLFL* genes clustered together and diverged into two secondary lineages. *Prunus SLFL* genes were more closely related to *Pyrus* and *Malus SFB* genes than *Prunus SFB* genes (Supplemental Fig. S3A).

The SSK1 proteins with two conserved domains of apple, pear and petunia were used in a BLAST search for the proteins predicted in the peach predict protein database (<http://www.rosaceae.org/>). The candidate *SSK1* gene (*PperSSK1*) was cloned with specific primers (Supplemental Table 2). The full-length coding sequence (CDS) of *PperSSK1* was amplified from ‘Hunchun Tao’ (*SIS2*) pollen and was subsequently identified in the other 36 peach varieties. The canonical Skp1 comprises 150 to 200 amino acid residues and contains a Skp1-POZ domain at the N terminus and a Skp1 domain at the C terminus. The deduced amino acid sequence of *PperSSK1* comprised 177 residues and contained the Skp1-POZ and the Skp1 domain. In the phylogenetic tree, *PperSSK1* clustered into a lineage with *PtSSK1* and *PavSSK1* (Supplemental Fig. S3B). In addition, the other two subunits of the SCF complex, *PperCUL1* and *PperRbx1*, were cloned with pollen cDNA of ‘Hunchun Tao’ (*SIS2*) as template. The candidate *PperCUL1* gene encoded the protein containing 744 amino acid residues and phylogenetic analysis showed that it clustered together with *MdCUL1* and *PavCULB* which have been shown to be a component of the SCF



336 complex (Tao et al., 2016; Yuan et al., 2014) (Supplemental Fig. S3C). PperRbx1  
337 protein contained 117 amino acid residues, and had an H2 loop figure domain at the  
338 C-terminus which is necessary for ubiquitin ligase activity.

339

### 340 **The Interactions between S-RNases and S-locus F-boxes**

341 Yeast two-hybrid analysis was performed to detect the interactions of PperSFBs  
342 with S-RNases. *PAI* (ppa011133m) (Aguiar et al., 2015), also a T2-RNase of *Prunus*  
343 *persica*, was cloned in this study. Because of no signal peptide, the full-length coding  
344 sequence (CDS) of *PAI* was cloned into pGBKT7 to detect the interactions of PA1  
345 with S-locus F-boxes. The results showed that the mutated PperSFB and normal  
346 PperSFB2 interacted with all the S-RNases, and these interactions displayed no allelic  
347 specificity. There was no interaction between PA1 and PperSFB (Supplemental Fig.  
348 S4A). Furthermore, the  $\beta$ -galactosidase reporter gene activity was detected and it  
349 showed that the intensity of interactions between these combinations was not high and  
350 the intensity of interaction between normal PperSFB2 and S2-RNase was slightly  
351 higher than that of other combinations (Supplemental Fig. S4B). Because of the  
352 insertion of the fragments, the proteins encoded by *PperSFB1m*, *PperSFB2m* and  
353 *PperSFB4m* genes were terminated prematurely and the domains at C-terminus was  
354 lost in varying degrees. In order to explore the effect of each part of the SFB on  
355 S-RNase, we divided the normal *PperSFB2* gene into four parts: box, box-V1, V1-V2  
356 and HVa-HVb (Supplemental Fig. S4C). Using yeast two-hybrid and bimolecular  
357 fluorescence complementation (BiFC) analysis, we found that the box region did not

358 interact with all of four S-RNases, whereas box-V1 and V1-V2 portions of PperSFB2  
 359 physically interacted with all four S-RNases, and the interactions displayed no allelic  
 360 specificity. From the yeast coloring time stained by X- $\alpha$ -gal and fluorescence intensity,  
 361 it could be seen that the interaction intensity between each combinations was not high.  
 362 Interestingly, the HVa-HVb of PperSFB2 only interacted with S2-RNase but not other  
 363 S-RNases, indicating a potential role in S-RNase-SFB specific recognition  
 364 (Supplemental Fig. S5).

365 The expression of *PperSLFL1-3* had pollen specificity and contained F-box  
 366 domains, which led to a problem that whether they might play roles in  
 367 self-incompatibility of peach. First, we detected the interactions of PperSLFL1-3 with  
 368 S-RNases. The Y2H and BiFC analysis were performed using various fusion  
 369 expression vectors containing *S-RNases* or *PperSLFL1-3*, respectively. The Y2H  
 370 assay showed that S-RNases interacted with PperSLFL1-3 with no allelic specificity,  
 371 respectively (Fig. 3A). The  $\beta$ -galactosidase report gene activity suggested that the  
 372 intensity of interaction between PperSLFL1 and the four S-RNases was slightly  
 373 higher than other various combinations (Fig. 3E). PA1 did not interact with any  
 374 PperSLFL proteins (Fig. 3A). To confirm that results, bimolecular fluorescence  
 375 complementation (BiFC) experiment was performed in *Nicotiana tabacum* leaves.  
 376 The BiFC results also indicated that PperSLFL1-3 interacted with the four *S-RNases*  
 377 with no allelic specificity (Fig. 4).

378

379 **Interaction analysis of S-locus F-boxes, PperSSK1, PperCUL1 and PperRbx1**

380 The yeast two-hybrid analysis was performed to investigate the interaction  
381 between PperSSK1 and PperSFBs/PperSLFLs, and the interaction between  
382 PperCUL1 and PperSSK1/PperRbx1. The results indicated that PperSSK1 interacted  
383 with PperSFB2, PperSFB1m, PperSFB2m and PperSFB4m (Fig. 3C), and the activity  
384 of  $\beta$ -galactosidase confirmed the intensity of the interaction was high (Fig. 3D). Both  
385 PperSSK1 and PperRbx1 interacted with PperCUL1, and the activity of  
386  $\beta$ -galactosidase analysis quantitatively demonstrated the interaction between them  
387 (Fig. 3B).

388 We also examined the interactions between PperSSK1 and three other  
389 pollen-expressed F-box proteins, PperSLFL1–3, to explore the hypothesis that  
390 PperSLFL proteins might play a role in self-incompatibility of peach. The yeast  
391 two-hybrid analysis was conducted using the full-length CDSs of these 3 S-locus  
392 F-box protein genes. All the three F-box proteins showed interaction with PperSSK1  
393 (Fig. 3C). The activity of  $\beta$ -galactosidase report gene quantitatively demonstrated the  
394 interaction between them, and the interaction between PperSSK1 and PperSLFL1 and  
395 PperSLFL2 was stronger than that of between PperSSK1 and PperSLFL3 (Fig.3D).

396

### 397 **A SCF complex containing PperSLFL1-3 ubiquitinates S-RNases in vitro**

398 In order to test whether S-RNases could be ubiquitinated by SCF<sup>SLFL</sup> in vitro,  
399 commercial His-UBA6 was used as the ubiquitin-activating (E1) and His-UBH6 was  
400 used as ubiquitin-conjugating enzyme (E2). Purified MBP-PperSLFL1-3,  
401 GST-PperSSK1, GST-PperRbx1 and GST-PperCUL1 were used as E3. Anti-MBP

antibody was used to detect MBP-PperSFB proteins and MBP-PperSLFL proteins by Western blot analysis, anti-S-RNase antibody was used to detect S-RNase proteins and ubiquitinated S-RNases and anti-GST antibody was used to detect GST-tagged proteins. Purified His-S-RNase proteins, MBP-SFB proteins and MBP-SLFL proteins were detected a single band (Fig. 5). Distinct immunoreactive bands with higher molecular masses (between 34 KDa and 130 KDa) were detected above the predicted His-S-RNase (26 KDa) bands, and no band was detected in the negative control reactions without His-S-RNase proteins (Fig. 6). The results indicated that PperSLFL proteins could ubiquitinate S-RNase of peach.

## Discussion

In this study, we selected 37 Chinese peach varieties from 18 areas of China, including the ancestral species (Guang He Tao), wild species (Qing Si, Huo Lian Jin Dan, Qing Mao Zi Bai Hua, Bai Nian He, Zhang Bai 5 and Long 1-2-4) and some common local varieties. After identifying the S-genotypes of all the peach varieties in this study (Supplemental Table 1), four previously described S haplotypes were identified S1, S2, S2m and S4. S2 was the most frequent S-haplotype in the tested Chinese peach varieties (occurred in 33 varieties), followed by S1 (in 10 varieties), S2m (in 7 varieties) and S4 (only in 3 varieties). All four S haplotypes, S1 S2, S2m, S4, found in this study had the same mutant versions as that reported previously (Tao et al., 2007; 2010). The mutated *S2m-RNase* and *SFB2m* genes, canonical *SFB2* gene and *S2-RNase* existed in Guang He Tao indicating that these mutations occurred

424 before the formation of Chinese peach cultivars. In the mountains of Tibet, peach  
425 might be propagated by seeds generally obtained from genotypes with high  
426 productivity. Because of the special natural environment, self-compatibility generally  
427 led to more reliable fruit set, which made the probability of survival in natural  
428 selection increased, but the genetic diversity in the S-locus was declined. We  
429 proposed that under selection pressure for SC, pollen part mutants might  
430 preferentially be selected compared to pistil part mutants because there were many  
431 pollen grains and the pollen genotype in a large extent affected the SI phenotype in  
432 GSI system. That is why all the peach S haplotypes characterized in this study are  
433 pollen part mutant S haplotypes and the S2-allele accumulates the most.

434 After analyzing the sequences of mutant pollen *S* genes, we found that the 155bp  
435 fragment inserted in *PperSFB1m* was duplicated from the 155bp region upstream of  
436 the insertion point, and the 5 bp fragment inserted in *PperSFB2m* was the same with  
437 the 5 bp upstream of the insertion point. The sequence of 351 bp at both ends of the  
438 inserted 4949bp fragment in *PperSFB4m* was also the same that had been reported  
439 (Fig. 1B) (Tao et al., 2010). That kind of mutant might be due to an error in  
440 homologous recombination, or a retro-transposition. As we know, gene duplication is  
441 a ubiquitous biological phenomenon, an important driving force for the diversification  
442 of genomic and genetic systems, and plays a very important role in the evolution of  
443 biological processes. This repetition in peach might have a significant for the study of  
444 its evolution.

445 In the S-RNase-based GSI system, non-self S-RNases in pollen tube are

446 detoxified. It is hypothesized that detoxification of non-self S-RNases in pollen is  
 447 mediated by the SCF complex. S-RNases are degraded by SCF<sup>SLF/SFBB</sup> mediating in  
 448 other plant species with the S-RNase-based GSI system (Tao and Iezzoni, 2010;  
 449 Iwano and Takayama, 2012; Yuan et al., 2014). In this study, three pollen-expressed  
 450 F-box genes (Fig. 1D and Fig. 2), named as PperSLFL1-3, located at the S locus of  
 451 peach (Fig 1C). Phylogenetic and evolutionary analysis indicated that PperSLFL1-3  
 452 clustered with SLFLs of other *Prunus* species on the same evolutionary branch, and  
 453 the evolution relationship between SLFLs and SFBBs of apple and pear was closer  
 454 than the evolution relationship between SLFLs and SFBs (Supplemental Fig. S3),  
 455 which was the same as Tao did (Tao et al., 2008). We speculated that the *Prunus* SI  
 456 recognition mechanism might have some differences compared to the mechanism in  
 457 the Maloideae. Researchers speculated that *Prunus* self-incompatibility mechanism  
 458 was ‘self recognition by a single factor’ system (Sonneveld et al., 2005). In the ‘self  
 459 recognition by a single factor’ system, the cytotoxic effect of non-self S-RNases is  
 460 thought to be inactivated by an unidentified ‘general inhibitor’ (GI) (Sonneveld et al.,  
 461 2005). The single factor we speculated was SFB, because the peach became  
 462 self-compatibility from self-incompatibility due to SFB mutant. SFB2 had a role in  
 463 self/non-self recognition, the variable region interacted with self/non-self S-RNase,  
 464 and the hypervariable region interacted with self-S-RNase (Supplemental Fig. S5).  
 465 We suspected that SFB specifically recognizes self-S-RNase to leave self-S-RNase  
 466 active, leading to the arrest of self pollen tube growth.

467         The F-box protein would be the good candidate for the GI. In sweet cherry,

468 S-RNases were recognized by PavSLFL2 (Matsumoto, 2016). In this study,  
 469 PperSLFL1-3 interacted with all the S-RNases with no allelic specificity (Fig. 3A),  
 470 and phylogenic analysis demonstrated that SLFLs including PperSLFL1-3 were  
 471 classified into the same clade as SFBB of the Maloideae. Since it is plausible that SI  
 472 or the S locus of Prunus and the Maloideae share the same origin (Igic and Kohn,  
 473 2001; Steinbachs and Holsinger, 2002), we suspect that *SLFLs* are homologs of *SFBB*.  
 474 During the evolution of SI in Prunus, SLFLs may lose their function in S  
 475 haplotype-specific interaction, and may recruit SFB for S haplotype-specific  
 476 interaction. All together, these results suggested that PperSLFL1-3 have appropriate  
 477 characteristics to be the GI.

478 Matsumoto (2012, 2016) showed that SFB and PavSLFLs interact with a  
 479 Skp1-like1 homolog that is proposed to be a component of the SCF complex involved  
 480 in the polyubiquitination of proteins targeted for degradation. By Y2H experiment, we  
 481 have known that PperSLFL1-3 could interact with PperSSK1 and participate in the  
 482 formation of SCF complex. It is possible that the PperSLFL1-3 would participate in  
 483 the degradation of S-RNase proteins in a process as with that SLF/SFBB proteins are  
 484 involved in the degradation of non-self S-RNase proteins (Kubo et al., 2010; Kakui et  
 485 al., 2011; Williams et al., 2014; Kubo et al., 2015). In vitro ubiquitination analysis, we  
 486 found that PperSLFL1-3 could make all the PperS-RNase proteins in this study tag  
 487 the polyubiquitin chain (Fig. 6). According to the result, we suspect the SLFL proteins  
 488 act as GIs to target all S-RNases with no allelic specificity in pollen.

489 In conclusion, our results suggested that PperSLFL1-3 were a subunit of SCF

490 complexes, recognized all S-RNases taken up into pollen tube and mediated  
 491 polyubiquitination of S-RNases. Because loss-of-function of SFB results in  
 492 pollen-part SC of peach unlike that in Japanese pear, the role of SLFL genes in the SI  
 493 has been the focus of attention. The Y2H assay and activity of  $\beta$ -galactosidase assay  
 494 showed that there was a strong interaction between PperSLFL1-3 and PperSSK1 and  
 495 PperS-RNases. We thought that when S-RNases were taken up into the pollen tube,  
 496 SFB would recognize self S-RNase and protect it by some kind of motification, and  
 497 SLFL proteins could not recognize and target it. Cytotoxic effect of self S-RNase  
 498 arrests pollen tube growing. When the SFB mutated, the ‘protection’ on self S-RNase  
 499 disappeared, SLFL proteins target S-RNase and tag polyubiquitin chain on it,  
 500 S-RNase could be degraded, and the pollen tube continue to grow to complete  
 501 fertilization. This model is needed to be carefully tested, and further studies are needed  
 502 to clarify the mechanism of self-incompatibility in *Prunus*.

503

504

## 505 **Figure legends**

### 506 **Fig. 1 Characterization and expression patterns of Chinese peach S genes**

507 (A) PCR analysis and schematic diagrams of the S2/2m-RNase in ‘Guang He Tao’.  
 508 The red line represents the mutation site of the S2-RNase. (B) Schematic diagram of  
 509 Chinese peach SFBs. The black arrows indicate the transcriptional orientations of the  
 510 genes. The red vertical bars indicate the stop codon, and the red numbers represent the  
 511 length of the encoding frame. The black boxes in SFB1m and SFB2m represent the



512 inserted fragment, and the gray boxes represent the same fragment of the gene as the  
 513 inserted fragment. The black boxes represent the same fragments at both ends of the  
 514 inserted fragment. (C) Schematic diagrams of the location of S2-RNase, SFB2m and  
 515 SLFLs at the S-locus. The directions of the arrows represent the transcriptional  
 516 orientations of S2-RNase, SFB2m and SLFLs. The middle parts in the red box  
 517 represent the introns. (D) Tissue-specific expression analysis of *S1-RNase*, *S2-RNase*,  
 518 *S2m-RNase* and *S4-RNase*, *SFB1m*, *SFB2m*, *SFB4m* and *SLFLs*. Total RNA from  
 519 different organs was extracted and used as template for cDNA synthesis.

520 **Fig. 2 Aligment of the deduced amino acid sequences of PperSLFL1, PperSLFL2**  
 521 **and PperSLFL3.** The three PperSLFLs sequences of Peach aligned using DNAMAN.  
 522 The F-box domain is marked by purple line above, and the FBA domain is marked by  
 523 black line above.

524 **Fig. 3 Yeast two-hybrid (Y2H) analysis to investigate interaction between**  
 525 **S-RNases, PperSFBs, PperSLFLs, PperSSK, PperCUL1 and PperRbx1.** (A)  
 526 and (E) Y2H assays and the activity of  $\beta$ -galactosidase assay of the interaction  
 527 between PperSLFLs and S-RNases, PA1 (ppa011133m, a T2-RNase in *Prunus*  
 528 *persica*). (B) Y2H assays and activity of  $\beta$ -galactosidase assay of interaction between  
 529 PperSSK1, PperRbx1 and PperCUL1. (C) and (D) Y2H assays and the activity of  $\beta$ -  
 530 galactosidase assay of interaction between PperSSK1 and PperSFBs and PperSLFLs.  
 531 Empty vector was used as negative control; SV40 and p53 was used as positive.  
 532 AD-activation domain; BD-DNA binding domain.

533 **Fig. 4 Bimolecular fluorescence complementation (BiFC) analysis of interactions**  
 534 **between PperSLFLs with S-RNases** Construct pairs of PperSLFLs-YFPN,  
 535 S-RNases-YFPC, YFPN and YFPC were transiently co-expressed in *Nicotiana*  
 536 *tabacum* leaves. Fluorescence is indicated by the YFP signal. Merged images of YFP  
 537 as well as bright field images are shown. PperSLFLs-YFPN and S-RNases-YFPC  
 538 were co-injected with empty vector respectively as negative control. Scale bars = 10  
 539  $\mu\text{m}$ .

540 **Fig. 5 Immunoblot detection of S-RNases and F-box proteins** *E.coli* expressing  
 541 S-RNases were detected by a polyclonal antibody. The polyclonal antibody against  
 542 the recombinant S2-RNase was raised in rabbit and the antibody detected not only  
 543 S2-RNase but also other allelic S-RNases without allelic specificity. *E.coli* expressing  
 544 F-box proteins were detected by commercial mouse monoclonal antibody. 10  $\mu\text{g}$  of  
 545 total proteins were loaded in each lane.

546 **Fig. 6 *In vitro* detection of ubiquitinated S-RNases** Each of the lanes was loaded  
 547 with 10  $\mu\text{g}$  protein. The ubiquitination of different PperS-RNases was analyzed with  
 548 the presence of PperSSK1, PperCUL1, PperSLFL1-3 and Ub. 10  $\mu\text{g}$  of PperSLFL1-3  
 549 proteins was added to each lane, respectively. The lanes without His-tagged S-RNase  
 550 were used as negative control.

551

## 552 **Supplemental data**

553 **Supplemental Fig. S1 The distribution of 37 peach varieties in China** The arrows  
 554 in the figure represent the evolutionary direction of peach in China. The red shade

represents the origin of Chinese peach, and the gray shades represent the secondary center of origin of Chinese peach, and the purple circles represent various Chinese peach population.

**Supplemental Fig. S2 Identification for the S genotypes of 36 peach varieties except Guang He Tao** The PCR were performed with DNA extracted from leaves as template and primers Pru-C2/Pru-C4R for S<sub>1</sub> and S<sub>2</sub>, and S<sub>4</sub> specific primers.

**Supplemental Fig. S3. Phylogenetic trees of CDSs of S locus F-box and deduced amino acid sequences of Skp1-like proteins and cullin-like proteins.** (A) A neighbor-joining tree was constructed from 64 S locus F-box genes from apple(*Malus domestica*; MdSFBBs), pear(*Pyrus × bretschneideri*; PbSFBBs), *Pyrus pyrifolia*; PpSFBBs), sweet cherry(*Prunus avium*; PavSFBs PavSLFLs), almond(*Prunus dulcis*; PdSFBs and PdSLFLs), plum(*Prunus mume*; PmSFBs and PmSLFLs, *Prunus salicina*; PsSFBs), apricot(*Prunus armeniaca*; ParSFBs), sour cherry(*Prunus cerasus*; PcSFB26), peach(*Prunus persica*; PperSFBs and PperSLFLs) and *Prunus speciosa* (PspSFB1). (B) Skp1-like proteins and cullin-like proteins were used to construct NJ trees. The deduced amino acid sequences of Skp1-like proteins were from *Arabidopsis thaliana*(AtSKPs), *Antirrhinum hispanicum*(AhSSK1), *Prunus tenella*(PtSSK1), *Petunia integrifolia*(PiSKP1,PiSKP3), *Pyrus × bretschneideri*(PbSKP1), *Malus domestica*(MdSSK1-2), *Prunus avium*(PavSSK1) and *Prunus persica*(PperSSK1). The deduced amino acid sequences of cullin-like proteins were from *Arabidopsis thaliana*(AtCUL1-3), *Prunus avium*(PavCUL1A, PavCUL1B), *Petunia integrifolia* (PiCUL1C), *Vitis vinifera*(VvCUL1-1,VvCUL1-2), *Nicotiana*

577 *tabacum*(NtCUL1-1) *Prunus tomentosa*(PtCUL1), *Prunus mume*(PmCUL), *Pyrus* ×  
578 *bretschneideri*(PbCUL1, PbCUL1-1), *Malus domestica*(MdCUL1-1,MdCUL1-2) and  
579 *Prunus persica* (PperCUL1). NJ trees were generated with 1000 bootstrap replicates.

580 **Supplemental Fig. S4 Yeast two-hybrid assay and for the interactions between**  
581 **PperSFBs and S-RNases** (A) Yeast two-hybrid assay for the interactions between  
582 PperSFBs and S-RNases. (B) The activity of β-galactosidase assay for the interactions  
583 between PperSFBs and S-RNases. Each of the combinations was selected 10 yeast  
584 plaques and then divided into 3 portions. Each portion was cultured and the activity of  
585 β-galactosidase was measured separately. (C) Constructs of AD::box, AD::box-V1,  
586 AD::V1-V2 and AD::HV<sub>a</sub>-HV<sub>b</sub>.

587 **Supplemental Fig. S5 Yeast two-hybrid assay and BiFC assay for the interaction**  
588 **between S-RNases and portions of PperSFB2** (A) Yeast two-hybrid assay for the  
589 interaction between S-RNases and portions of PperSFB2. Various combinations of  
590 AD and BD fusions are tested for their growth on SD/-Leu/-Trp/-His/-Ade media. (B)  
591 BiFC assay for the interaction between S-RNases and portions of PperSFB2.  
592 Fluorescence is indicated by the YFP signal. Merged images of YFP as well as bright  
593 field images are shown. Scale bars = 10 μm.

594 **Supplemental Table 1 Thirty seven wild and local genotypes of Chinese peach**

595

## 596 **Acknowledgements**

597 We thank Professor Lirong Wang from the Zhengzhou Institute of Pomology for  
598 providing the peach material. This work was supported by the National Natural

599 Science Foundation of China (31171941 and 31372035). We thank PlantScribe  
600 (www.plantscribe.com) for editing this manuscript.

601

## 602 **Affiliations**

603 Laboratory of Fruit Cell and Molecular Breeding, College of Agronomy and Bio-tech,  
604 China Agricultural University, Beijing 100193, China.

605 Qiuju Chen, Dong Meng, Zhaoyu Gu, Wei Li, Hui Yuan, Xuwei Duan, Qing Yang,  
606 Yang Li & Tianzhong Li.

607

## 608 **Contributions**

609 T. L. and D. M. designed the study; Q. C., D. M. and Z. G. performed the experiment.  
610 W. L., X. D. Q. Y. and Y. L. contributed reagents/materials. T. L. and D. M. wrote the  
611 paper. All authors read and approved the final manuscript.

612

## 613 **Competing financial interests**

614 The authors declare no competing financial interests.

615

616

## References

- Aguiar B, Vieira J, Cunha A E, Fonseca N A, Iezzoni A, van Nocker S and Vieira CP (2015) Convergent evolution at the gametophytic self-incompatibility system in *Malus* and *Prunus*. PLoS One, 10(5):e0126138.
- Boivin N, Morse D, Cappadocia M (2014) Degradation of S-RNase in compatible pollen tubes of *Solanum chacoense* inferred by immunogold labeling. J Cell Sci, 127:4123–4127.
- Cao K, Zheng Z, Wang L, Liu X, Zhu GR, et al. (2014) Comparative population genomics reveals the domestication history of the peach, *Prunus persica*, and human influences on perennial fruit crops. *Genome Biol*, 15: 415.
- Crane M and Lewis D (1942) Genetical studies in pears III. incompatibility and sterility. J. Genet., 43:31–43.
- de Nettancourt D (2001) Incompatibility and incongruity in wild and cultivated plants. Springer, Berlin.
- Deshaies RJ and Joazeiro CAP (2009) RING domain E3 ubiquitin ligases. Annu Rev Biochem, 78: 399–434.
- Entani T, Iwano M, Shiba H, Che F-S, Isogai A and Takayama S (2003) Comparative analysis of the self-incompatibility (S-) locus region of *Prunus mume*: identification of a pollen-expressed *F-box* gene with allelic diversity. Genes Cells, 8: 203–213.
- Entani T, Kubo K, Isogai S, Fukao Y, Shirakawa M, Isogai A and Takayama S (2014) Ubiquitin-proteasome-mediated degradation of S-RNase in a solanaceous

- cross-compatibility reaction. *Plant J.*, 78: 1014–1021.
- Franklin-Tong VE (2008) Self-incompatibility in flowering plants. Springer, Berlin
- Goldraij A, Kondo K, Lee CB, Hancock CN, Sivaguru M, VazquezSantana S, Kim S, Phillips TE, Cruz-Garcia F and McClure B (2006) Compartmentalization of S-RNase and HT-B degradation in self-incompatible *Nicotiana*. *Nature*, 439: 805–810.
- Hanada T, Watari A, Kibe T, Yamane H, Wünsch A, Gradziel TM, Sasabe Y, Yaegaki H, Yamaguchi M and Tao R (2014) Two Novel Self-compatible *S* Haplotypes in Peach (*Prunus persica*). *J. Japan. Soc. Hort. Sci.* 83 (3): 203–213.
- Hao J, Wang H, Li J and Yu Y (2009) Study on the method of determining  $\beta$  - galactosidase activity in Yeast 2 - hybrid reporter gene. *Shanghai Jiaotong University (Medical Science)*, 29(2): 236-240.
- Hauck NR, Yamane H, Tao R and Iezzoni AF (2006) Accumulation of non-functional S-haplotypes results in the breakdown of gametophytic self-incompatibility in tetraploid *Prunus*. *Genetics*, 172: 1191–1198.
- Hua Z and Kao T (2008) Identification of major lysine residues of S<sub>3</sub>-RNase of *Petunia inflata* involved in ubiquitin-26S proteasome mediated degradation in vitro. *Plant J*, 54: 1094–1104.
- Hua Z and Kao TH (2006) Identification and characterization of components of a putative petunia S-locus F-box-containing E3 ligase complex involved in S-RNase-based self-incompatibility. *Plant Cell*, 16: 2531-2553.
- Igic B and Kohn JR (2001) Evolutionary relationships among self-incompatibility

- RNases. *Proc Natl Acad Sci USA*, 98: 13167-13171.
- Iwano M and Takayama S (2012) Self/non-self discrimination in angiosperm self-incompatibility. *Curr Opin Plant Biol*, 15:78–83.
- Kajiura M, Kanato K, Machida Y and Kozaki I (1967) New Japanese pear variety ‘Shinsui’. *Bull. Fruit Tree Res Stn A*, 6: 69–76.
- Kajiura M, Kanato K, Machida Y, Kozaki I, Tashiro T and Nakaya E (1969) New Japanese pear variety ‘Hayatama’. *Bull. Fruit Tree Res Stn A*, 8: 7–14.
- Kajiura M, Kanato K, Machida Y, Maeda M, Kozaki I, Tashiro T, Kishimoto O and Seike K (1974) New Japanese pear cultivar ‘Hakko’ and ‘Hosui’. *Bull. Fruit Tree Res Stn A*, 1: 1–12.
- Kakui H, Kato M, Ushijima K, Kitaguchi M, Kato S and Sassa H (2011) Sequence divergence and loss-of-function phenotypes of S locus F-box brothers (SFBB) genes are consistent with non-self recognition by multiple pollen determinants in self-incompatibility of Japanese pear (*Pyrus pyrifolia*). *Plant J*, 68: 1028–1038.
- Kubo K, Entani T, Tanaka A, Wang N, Fields AM, Hua Z, Toyoda M, Kawashima S, Ando T, Isogai A, Kao TH and Takayama S (2010) Collaborative non-self recognition system in S-RNase-based self-incompatibility. *Science*, 330: 796–799.
- Kubo K, Paape T, Hatakeyama M, Entani T, Takara A, Kajihara K, Tsukahara M, Shimizu-Inatsugi R, Shimizu KK and Takayama S (2015) Gene duplication and genetic exchange drive the evolution of S-RNase-based self-incompatibility in *Petunia*. *Nat Plants*, 1:14005.



- Lai Z, Ma W, Han B, Liang L, Zhang Y, Hong G and Xue Y (2002) An F-box gene linked to the self-incompatibility (S) locus of *Antirrhinum* is expressed specifically in pollen and tapetum. *Plant Mol Biol*, 50: 29–42.
- Lansari A and Iezzoni A (1990) A preliminary analysis of self-incompatibility in sour cherry. *HortSci*, 25: 1636–1638.
- Lechner E, Achard P, Vansiri A, Potuschak, T and Genschik P (2006) F-box proteins everywhere. *Curr. Opin. Plant Biol.*, 9: 631–638.
- Li MF, Li XF, Han ZH, Shu HR and Li T (2009) Molecular analysis of two Chinese pear (*Pyrus bretschneideri* Rehd.) spontaneous self-compatible mutants, Yan Zhuang and Jin Zhui. , *Plant Biol (Stuttg)*, 11: 774–783.
- Lin X, Darnay BG and Lin HK (2009) The E3 ligase TRAF6 regulates Akt ubiquitination and activation. *Science*, 325:1134–1138.
- Liu W, Fan J, Li J, Song Y, Li Q, Zhang Y and Xue Y (2014) SCF(SLF)- mediated cytosolic degradation of S-RNase is required for cross-pollen compatibility in S-RNase-based self-incompatibility in *Petunia hybrida*. *Front Genet.*, 5: 228.
- Luu DT, Qin X, Laublin G, Yang Q, Morse D and Cappadocia M (2001) Rejection of S-heteroallelic pollen by a dual-specific S-RNase in *Solanum chacoense* predicts a multimeric SI pollen component. *Genetics*, 159: 329–335.
- Luu DT, Qin X, Morse D and Cappadocia M (2000) S-RNase uptake by compatible pollen tubes in gametophytic self-incompatibility. *Nature*, 407: 649–651.
- Matsumoto D and Tao R (2016) Recognition of a wide-range of S-RNases by S locus F-box like 2, a general-inhibitor candidate in the *Prunus*-specific S-RNase-based

- self-incompatibility system. *Plant Mol Biol*, 91:459–469.
- Matsumoto D, Yamane H, Abe K and Tao R (2012) Identification of a Skp1-like protein interacting with SFB, the pollen S determinant of the gametophytic self-incompatibility in *Prunus*. *Plant Physiol*, 159: 1252–1262.
- McClure B, Cruz-García F and Romero C (2011) Compatibility and incompatibility in S-RNase-based systems. *Ann Bot*, 108: 647–658.
- Meng D, Gu Z, Li W, Wang A, Yuan H, Yang Q and Li T (2014) Apple MdABCF assists in the transportation of S-RNase into pollen tubes. *Plant J.*, 78: 990-1002.
- Meng X, Sun P and Kao T (2011) S-RNase-based self-incompatibility in *Petunia inflata*. *Ann. Bot.*, 108: 637–646.
- Okada K, Takasaki T, Saito T, Moriya Y, Castillo C, Norioka S and Nakanishi T (2004) Reconsideration of S-genotype for a Japanese pear ‘Kumoi’. *J. Japan Soc. Hort. Sci.*, 73: 524–528.
- Okada K, Tonaka N, Moriya Y, Norioka N, Sawamura Y, Matsumoto T, Nakanishi T and Takasaki-Yasuda T (2008) Deletion of a 236 kb region around *S<sub>4</sub>-RNase* in a stylar-part mutant *S<sub>4</sub><sup>sm</sup>*-haplotype of Japanese pear. *Plant Mol. Biol.*, 66: 389–400.
- Saitou N and Nei M (1987) The neighbor-joining method: a new method for reconstructing phylogenetic trees. *Mol. Biol. Evol.*, 4: 406–425.
- Sassa H, Kakui H and Minamikawa M (2010) Pollen-expressed F-box gene family and mechanism of S-RNase-based gametophytic self-incompatibility (GSI) in *Rosaceae*. *Sex Plant Reprod*, 23: 39–43.

Sassa H, Kakui H, Miyamoto M, Suzuki Y, Hanada T, Ushijima K, Kusaba M, Hirano

H and Koba T (2007) S locus F-box brothers: multiple and pollen-specific F-box genes with S haplotype-specific polymorphisms in apple and Japanese pear. *Genetics*, 175: 1869–1881.

Sijacic P, Wang X, Skirpan AL, Wang Y, Dowd PE, McCubbin AG, Huang S and Kao

TH (2004) Identification of the pollen determinant of S-RNase-mediated self-incompatibility. *Nature*, 429: 302–305.

Sonneveld T, Tobutt KR, Vaughan SP and Robbins TP (2005) Loss of pollen-S

function in two self-compatible selections of *Prunus avium* is associated with deletion/mutation of a S-haplotype specific F-box gene. *Plant Cell*, 17:37–51.

Steinbachs JE and Holsinger KE (2002) S-RNase-mediated gametophytic

self-incompatibility is ancestral in eudicots. *Mol Biol Evol*, 19: 825-829.

Tao R and Iezzoni A.F (2010) The S-RNase-based gametophytic self-incompatibility

system in *Prunus* exhibits distinct genetic and molecular features. *Sci. Hortic.*, 124: 423–433.

Tao R, Akiko Watari, Toshio Hanada, Tsuyoshi Habu Hideaki Yaegaki Yamaguch

Masami, Yamane H (2007) Self-compatible peach (*Prunus persica*) has mutant versions of the S haplotypes found in self-incompatible *Prunus* species. *Plant Mol Biol* 63:109–123.

Tao R, Matsumoto D, Yamane H (2008) Characterization of *SLFL1*, a

pollen-expressed F-box gene located in the *Prunus* S locus. *Sex Plant Reprod*, 21: 113-121.

- Tsukamoto T, Hauck NR, Tao R, Jiang N and Iezzoni AF (2006) Molecular characterization of three non-functional S-haplotypes in sourcherry (*Prunus cerasus*). Plant Mol. Biol., 62: 371–383.
- Ushijima K, Sassa H, Dandekar AM, Gradziel TM, Tao R and Hirano H (2003) Structural and transcriptional analysis of the self-incompatibility locus of almond: identification of a pollen-expressed F-box gene with haplotype-specific polymorphism. Plant Cell, 15:771–781.
- Ushijima K, Yamane H, Watari A, Kakehi E, Ikeda K, Hauck NR, Iezzoni AF and Tao R (2004) The S haplotype-specific F-box protein gene, *SFB*, is defective in self-compatible haplotypes of *Prunus avium* and *P. mume*. Plant J., 39: 573–586.
- Williams JS, Der JP, de Pamphilis CW and Kao TH (2014) Transcriptome analysis reveals the same 17 S-locus F-box genes in two haplotypes of the self-incompatibility locus of *Petunia inflata*. Plant Cell, 26: 2873–2888.
- Wu K, Fuchs SY, Chen A, Tan P, Gomez C, Ronai Z and Pan ZQ (2000) The SCF (HOS/beta-TRCP)-ROC1 E3 ubiquitin ligase utilizes two distinct domains within CUL1 for substrate targeting and ubiquitin ligation. Mol. Cell Biol., 20(4): 1382 - 93.
- Yamane H, Ikeda K, Ushijima K, Sassa H and Tao R (2003) A pollen-expressed gene for a novel protein with an F-box motif that is very tightly linked to a gene for S-RNase in two species of cherry *Prunus cerasus* and *P. avium*. Plant Cell Physiol, 44: 764–769.
- Yuan H, Meng D, Gu Z, Li W, Wang A, Yang Q, Zhu Y and Li T (2014) A novel gene,

*MdSSK1*, as a component of the SCF complex rather than *MdSBP1* can mediate the ubiquitination of S-RNase in apple. J. Exp Bot., 65: 3121-3131.

Zhao L, Huang J, Zhao Z, Li Q, Sim T and Xue Y (2010) The Skp1-like protein SSK1 is required for cross-pollen compatibility in S-RNase-based self-incompatibility. Plant J., 62: 52–63.

Zheng N, Schulman BA, Song L, Miller JJ, Jeffrey PD, Wang P, Chu C, Koepp DM, Elledge SJ, Pagano M, et al. (2002) Structure of the Cull1-Rbx1-Skp1-F-boxSkp2 SCF ubiquitin ligase complex. Science, 416: 703–709.



A

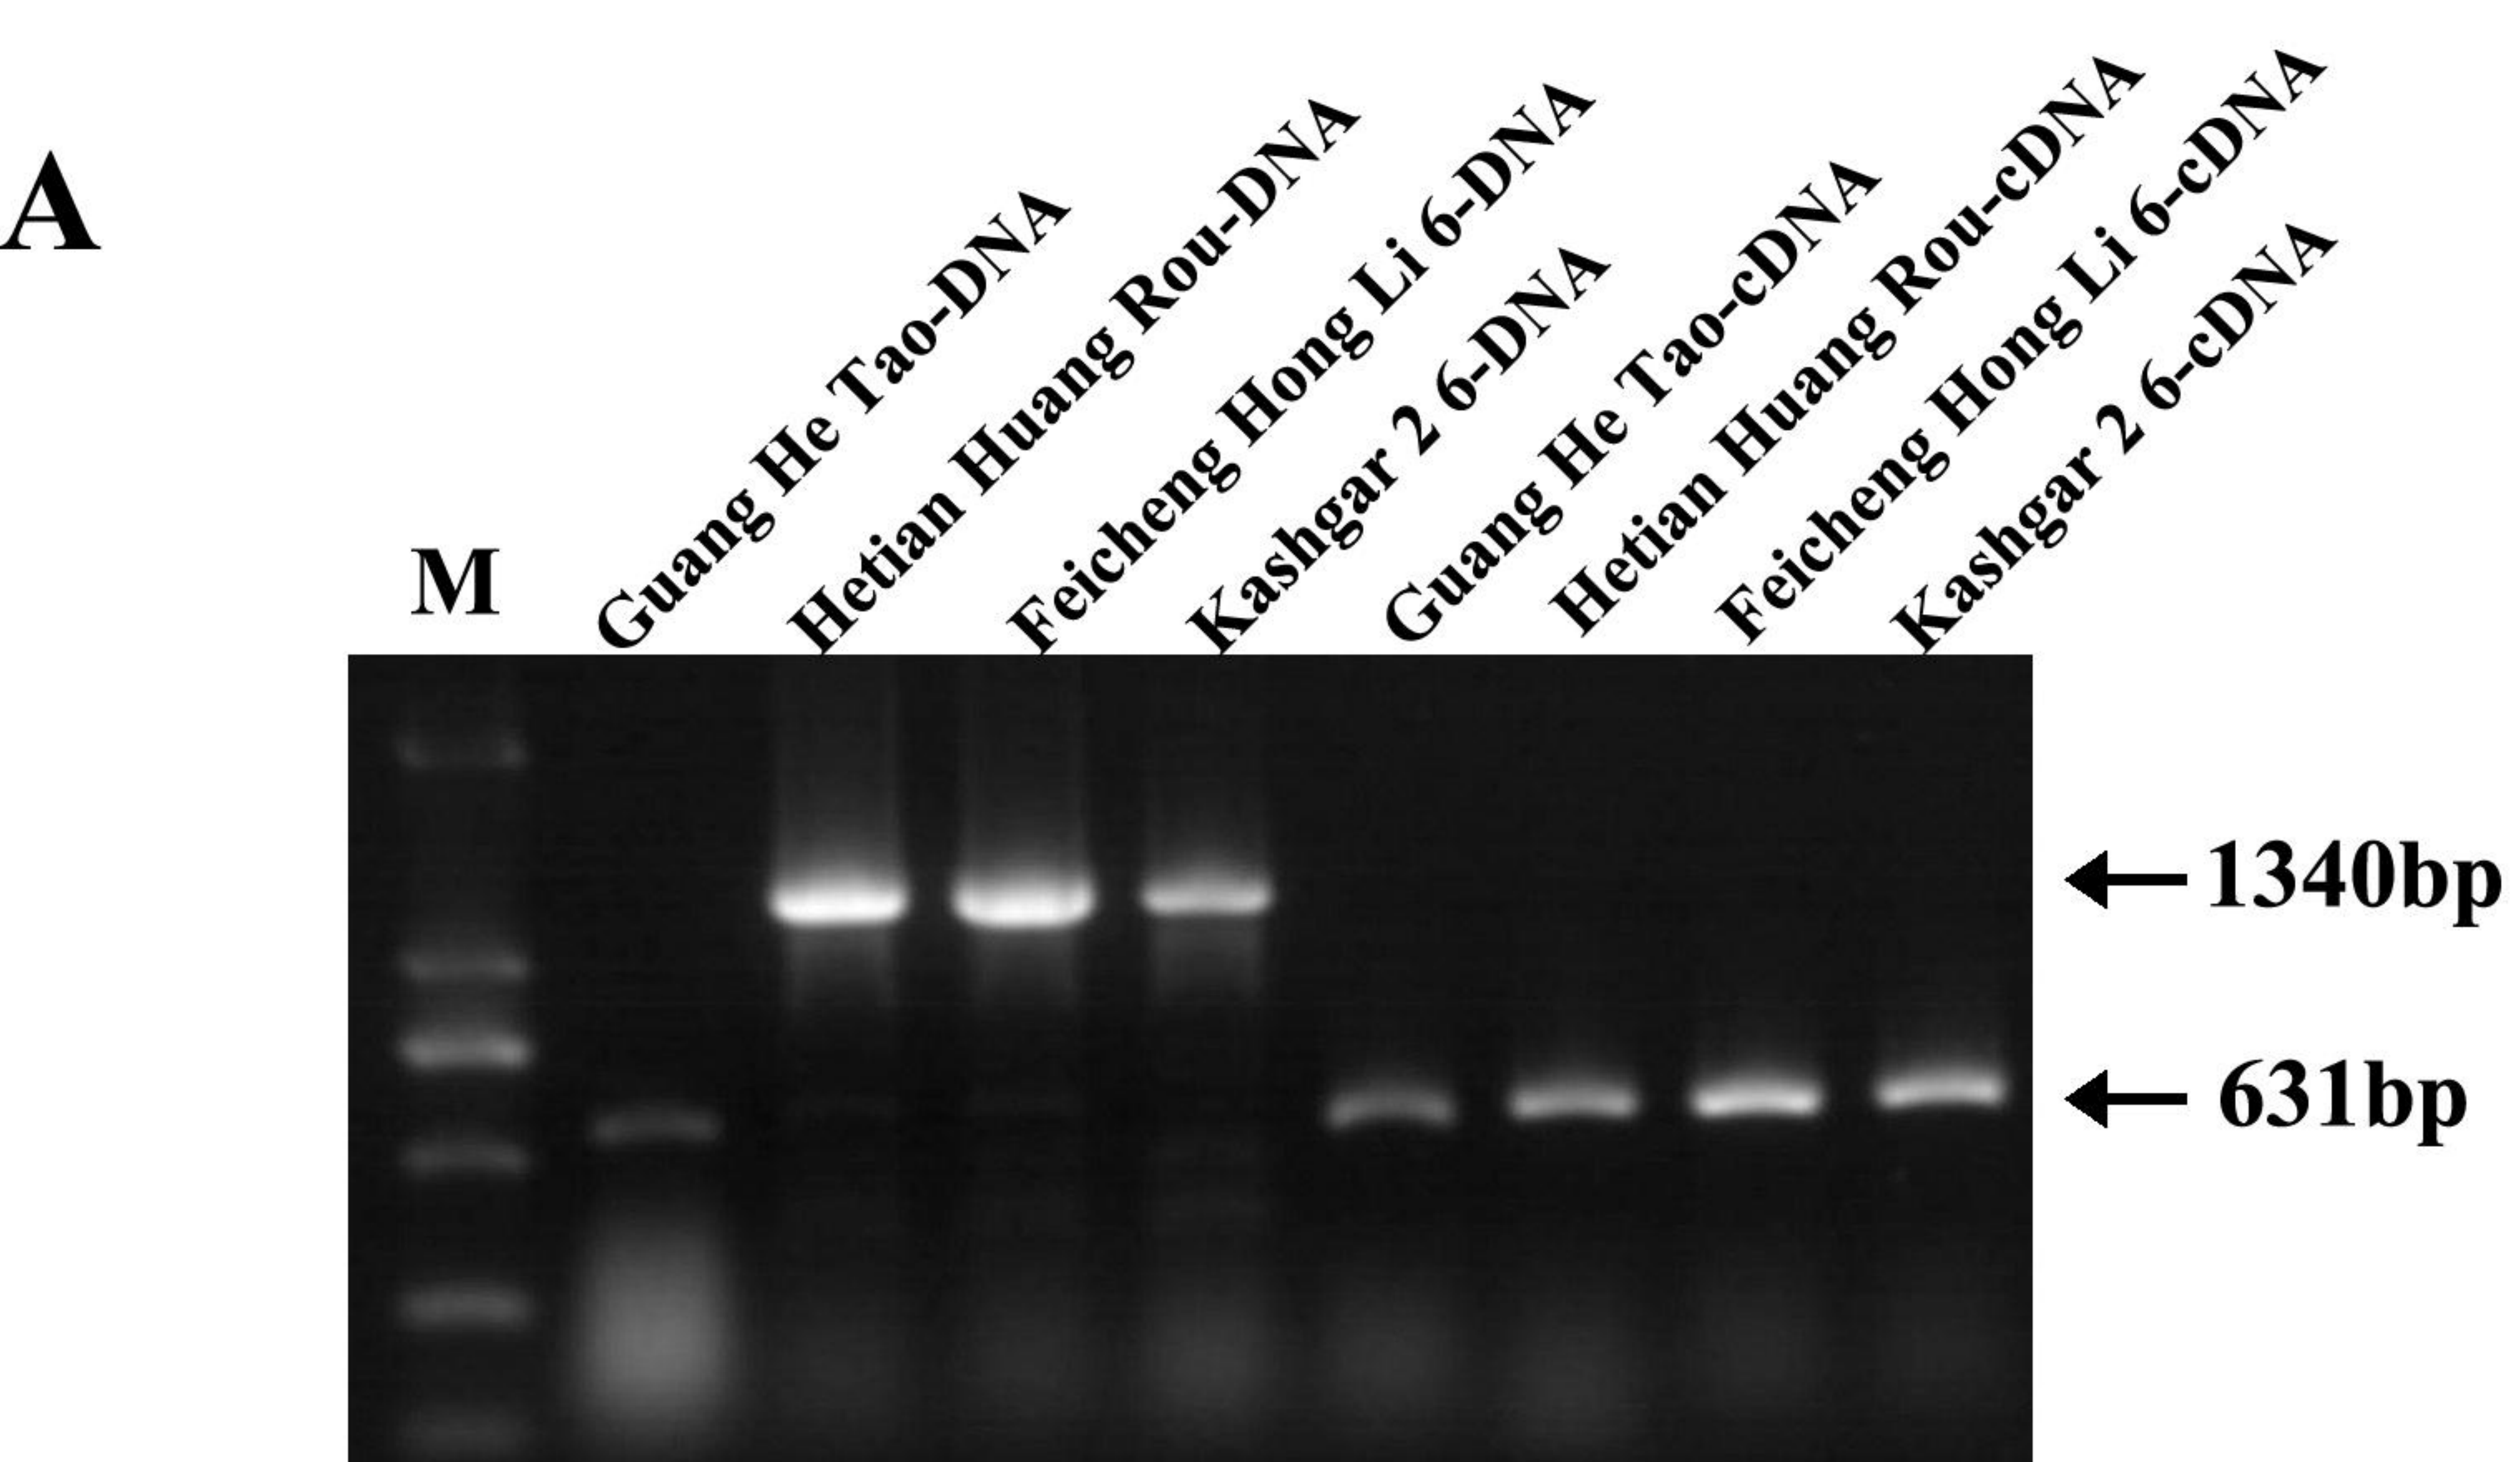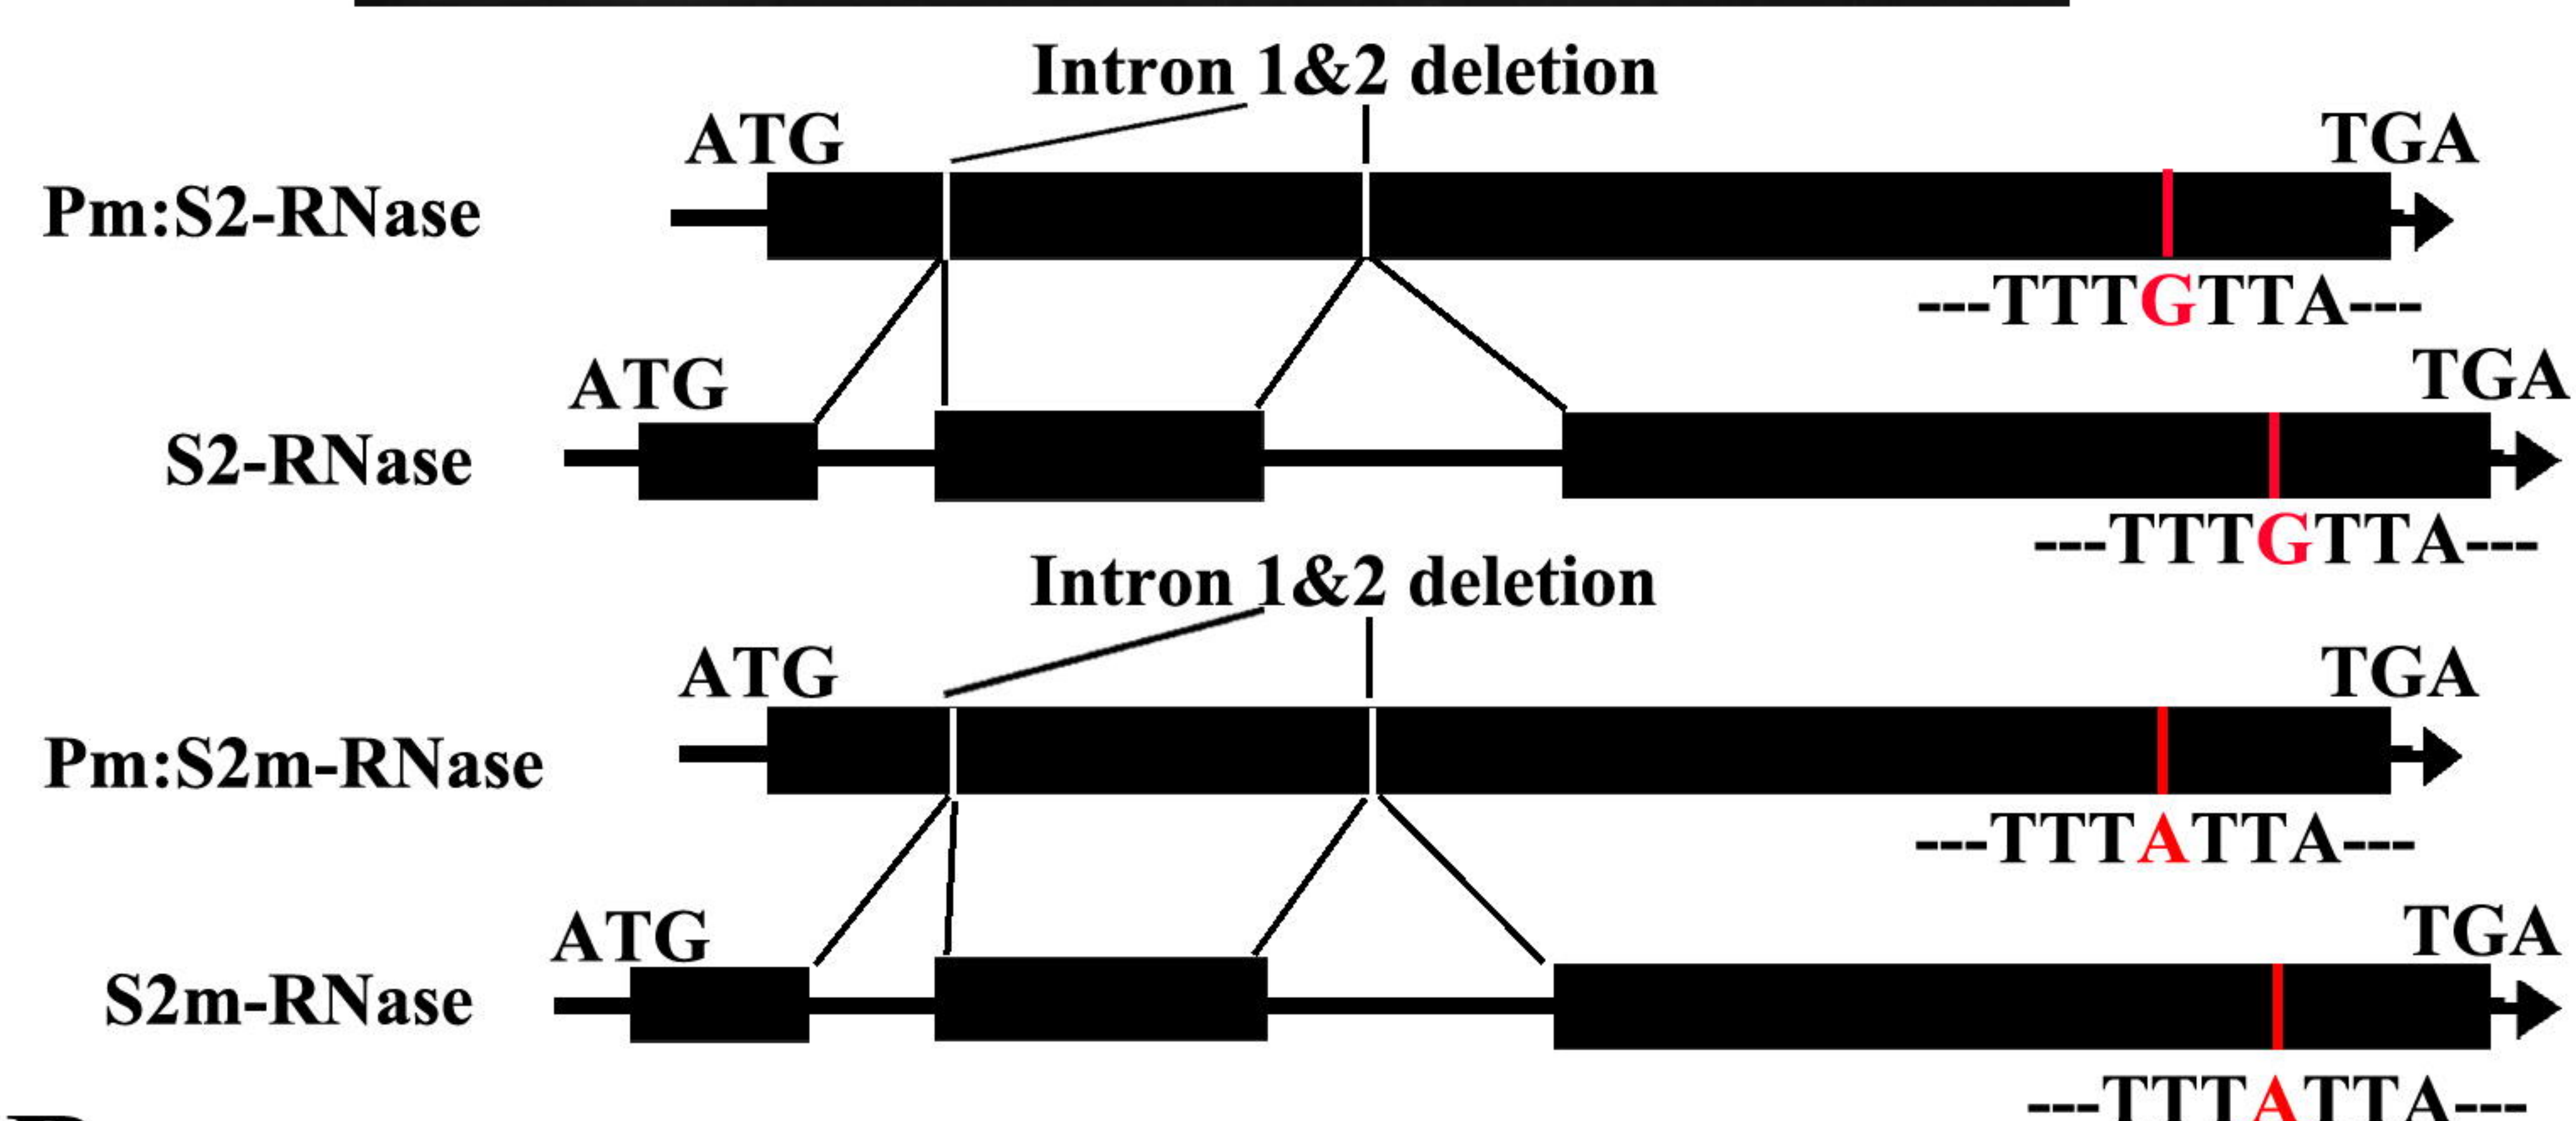

B

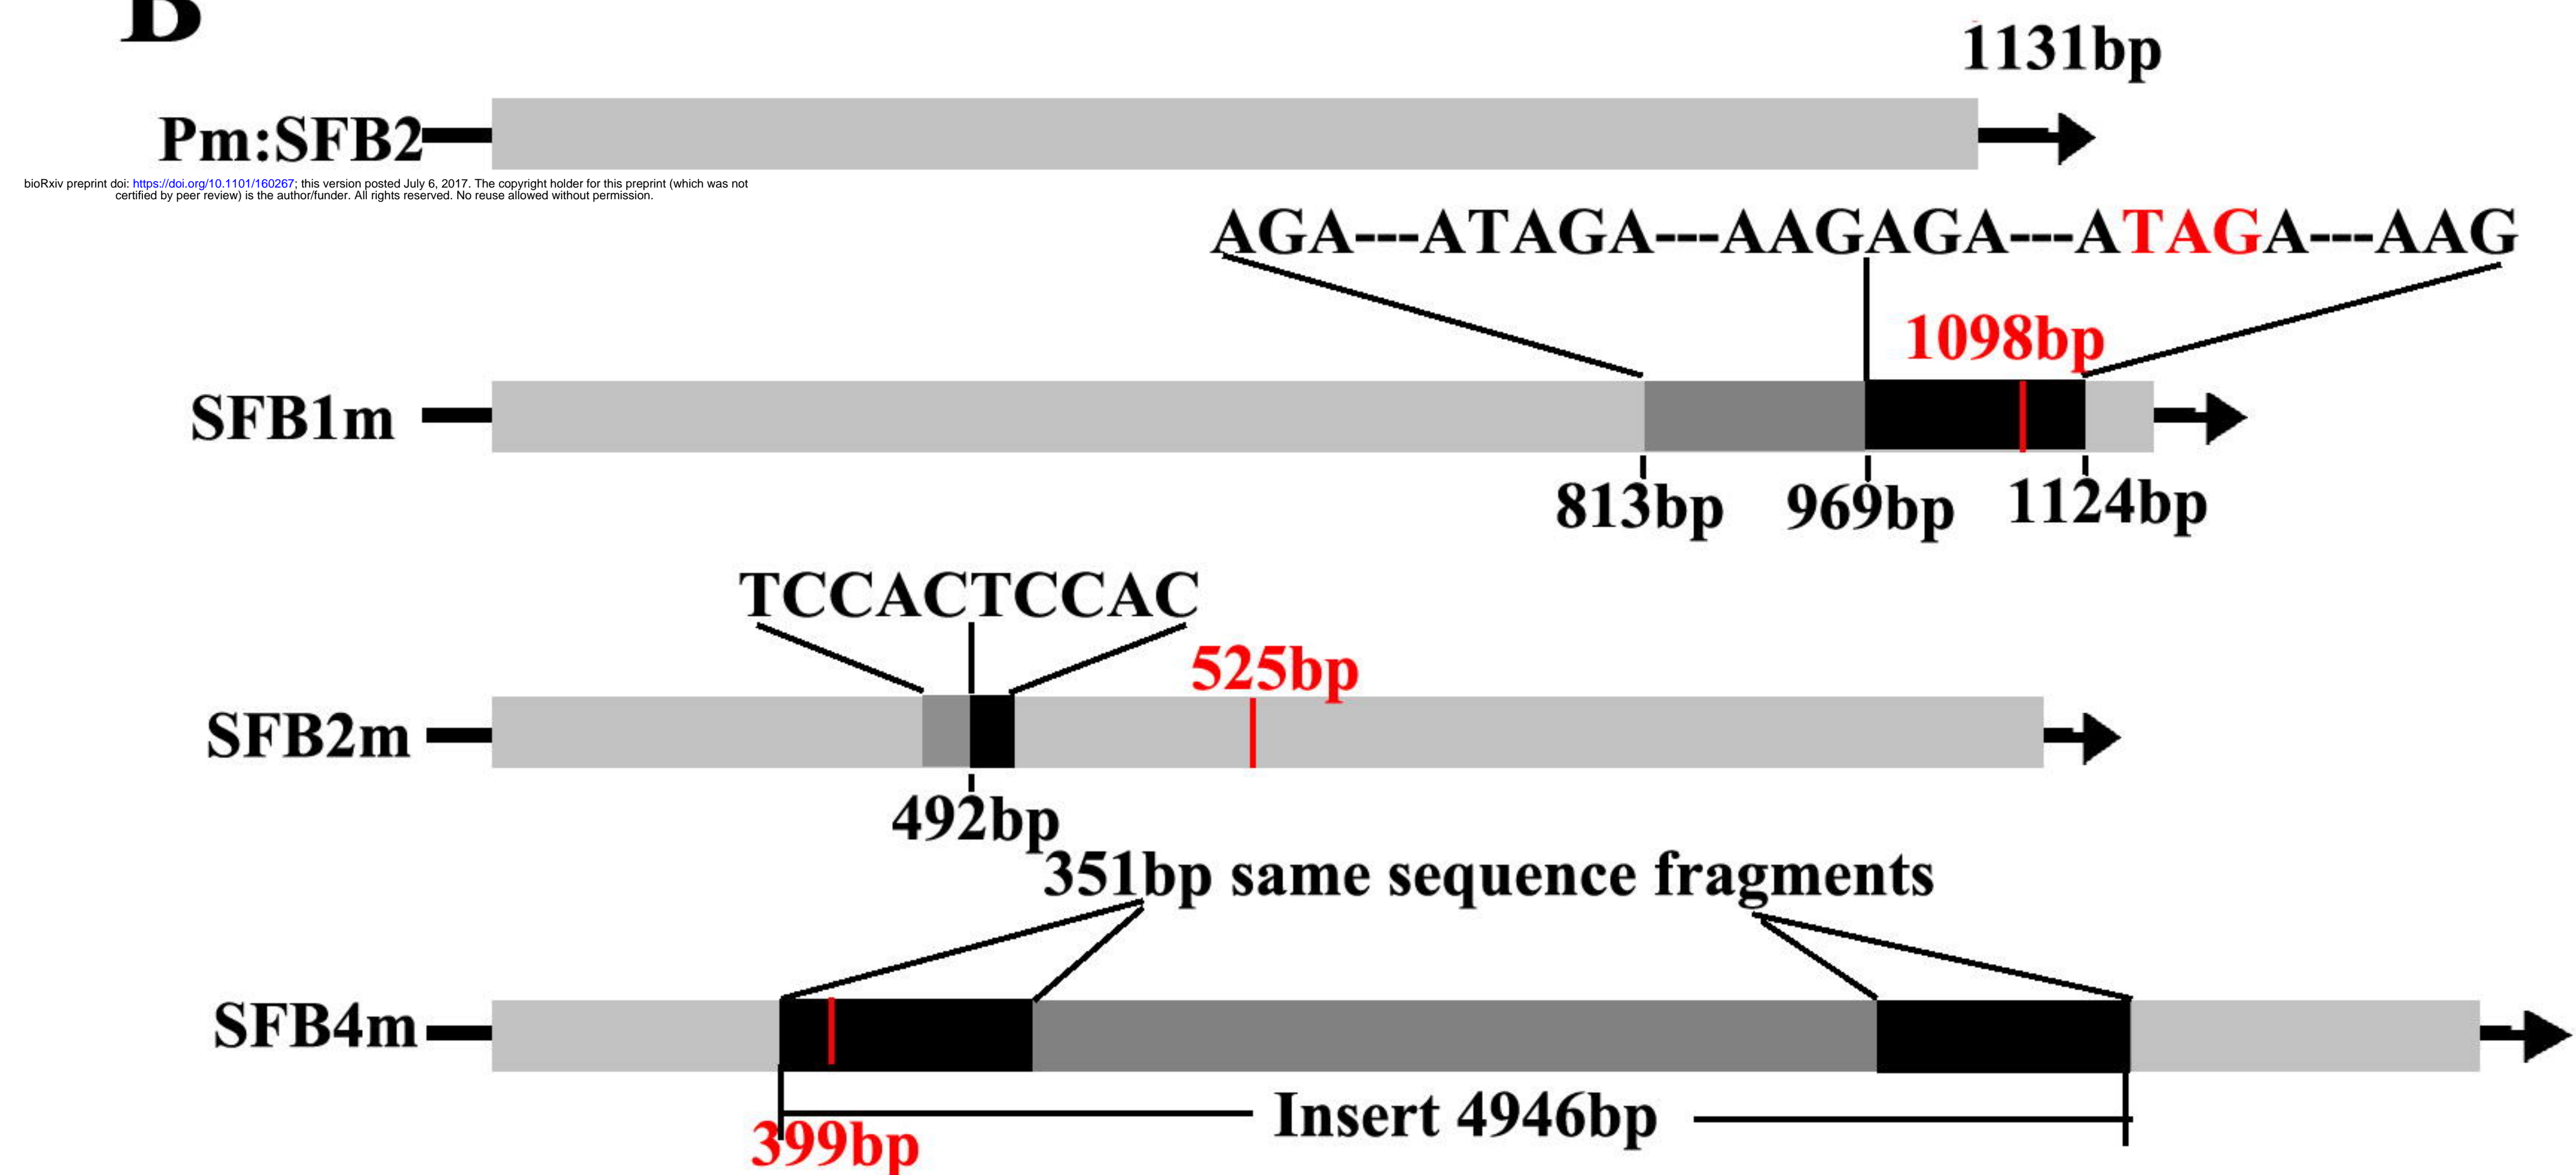

C

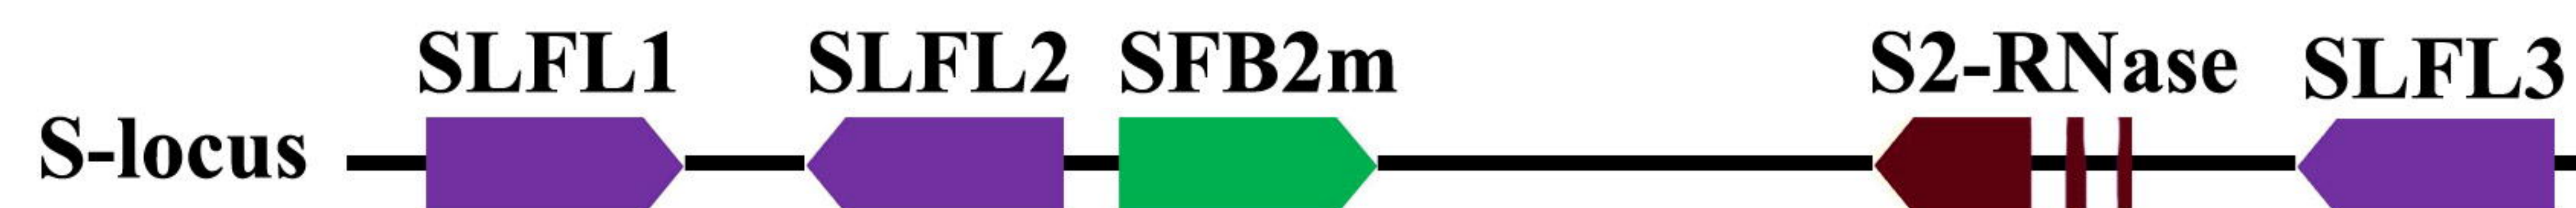

D

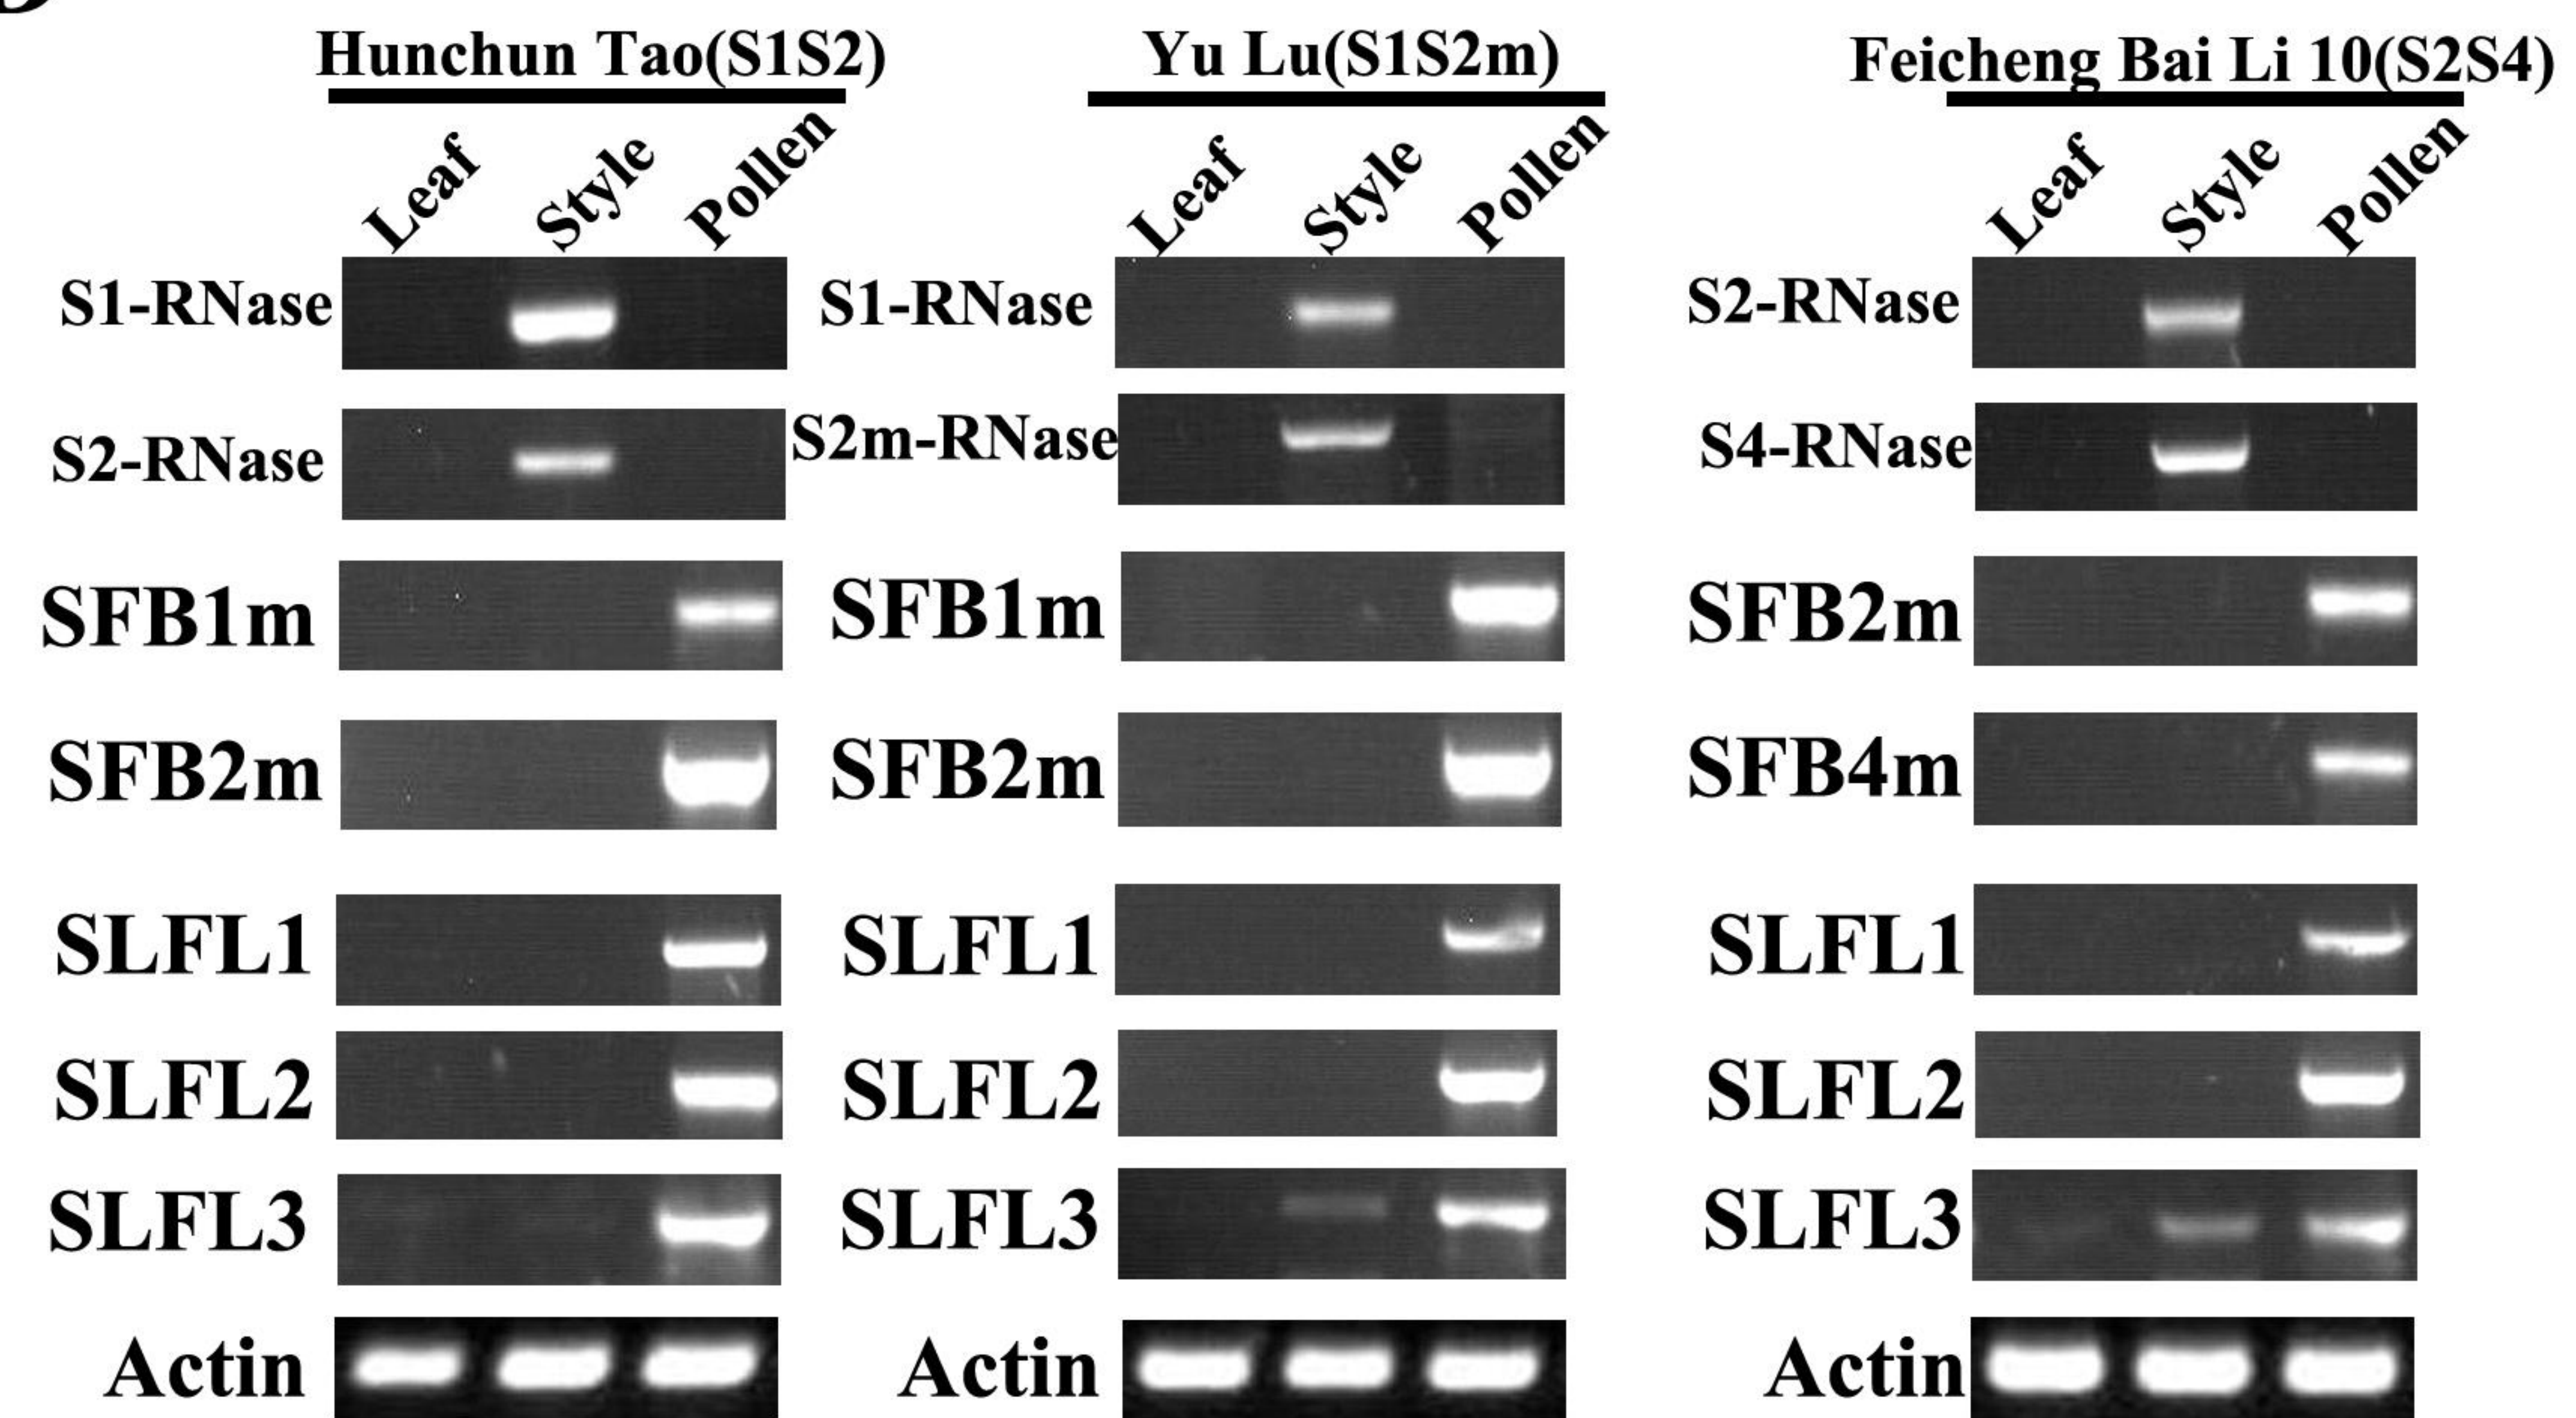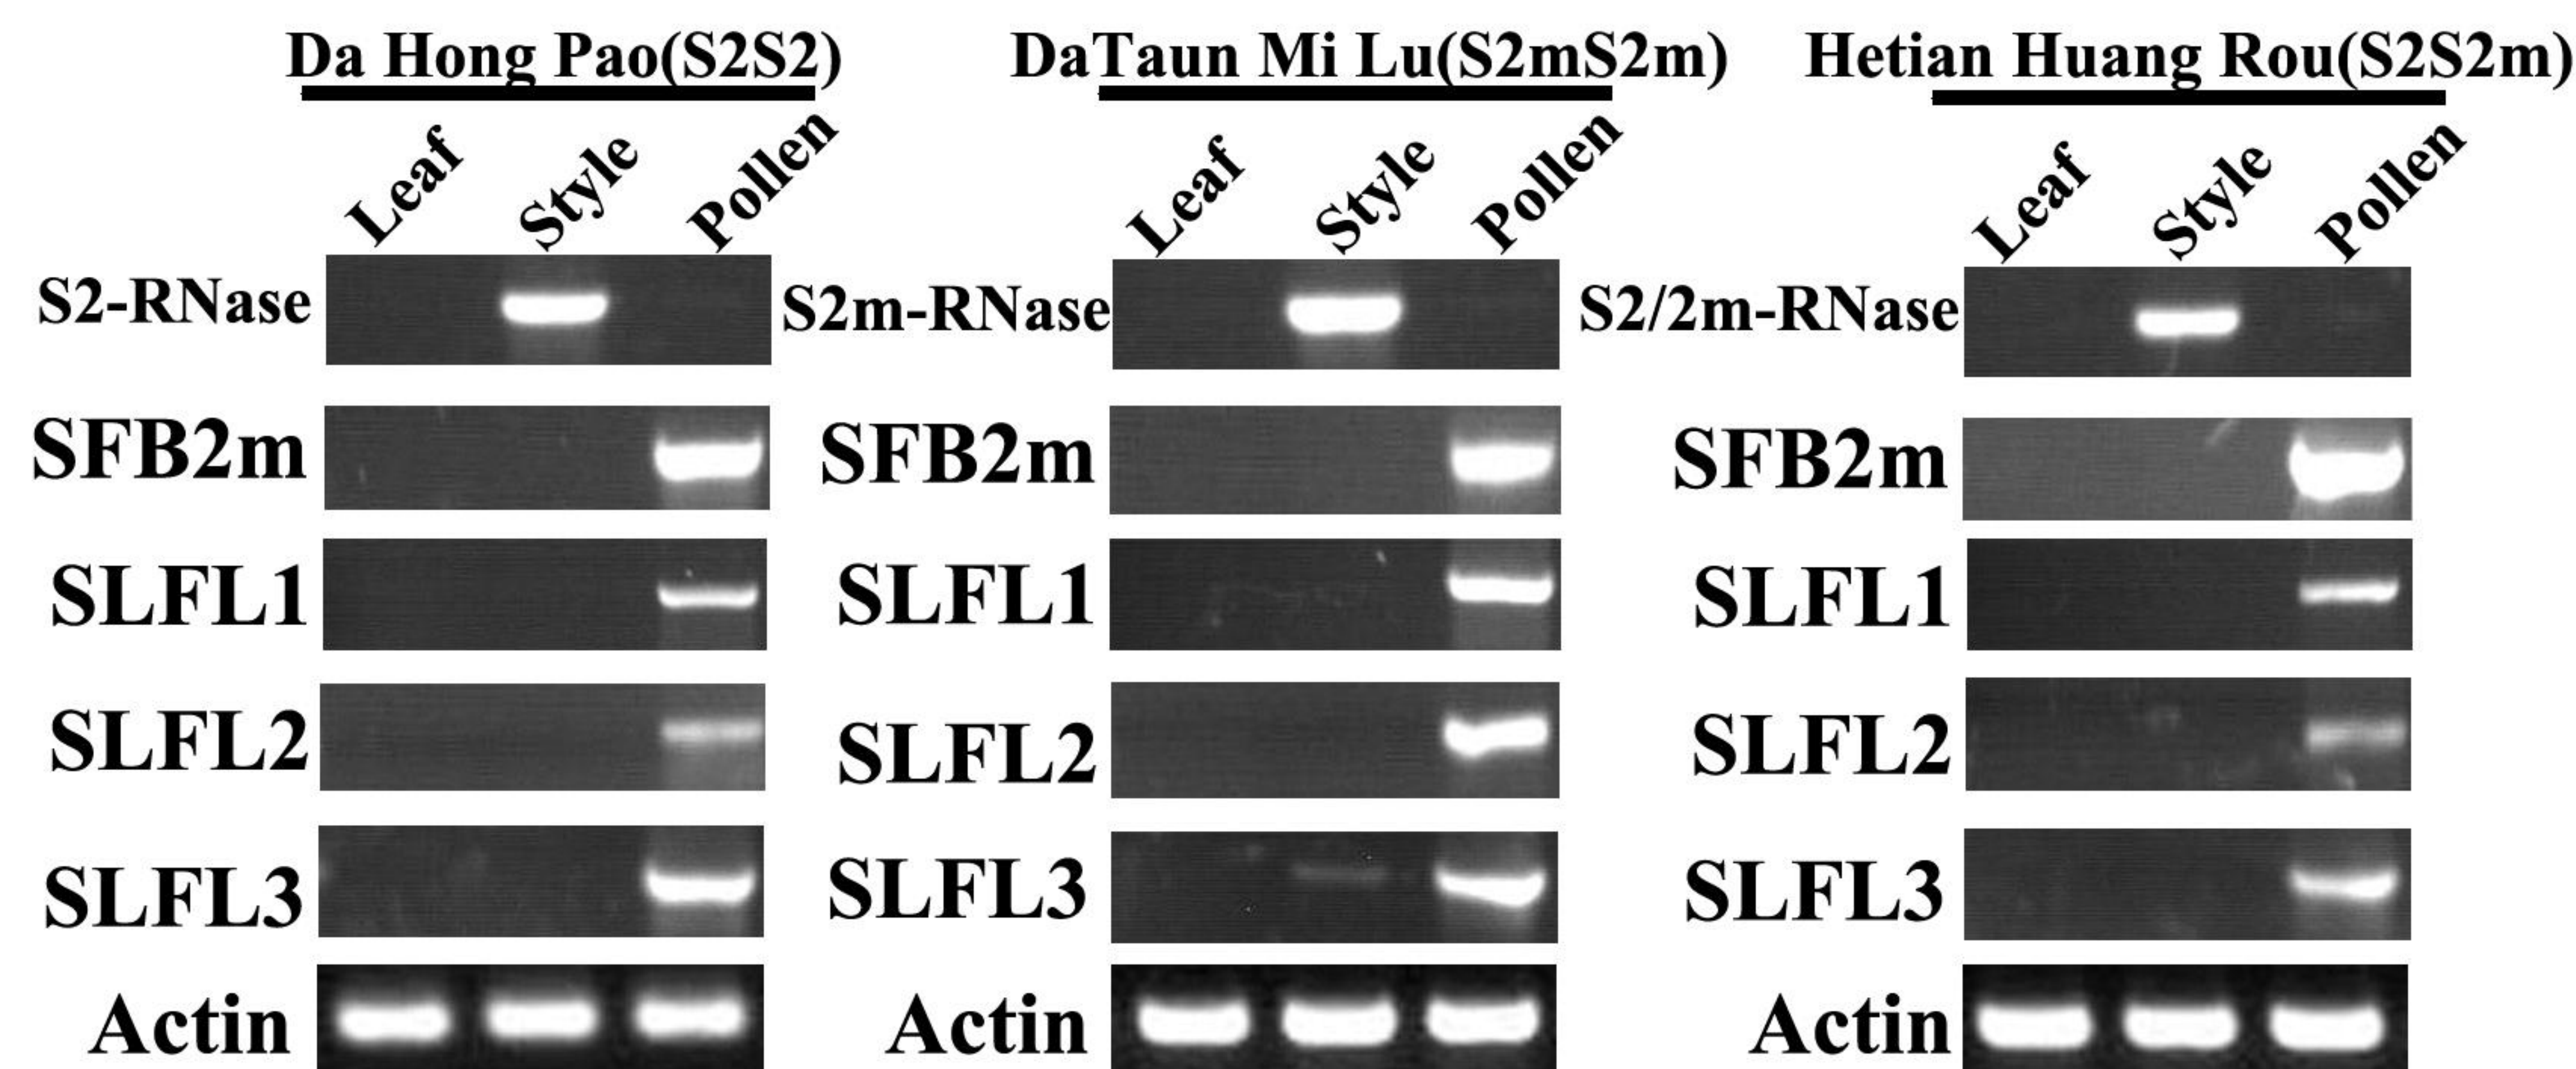



## F-box motif

bioRxiv preprint doi: <https://doi.org/10.1101/160287>; this version posted July 6, 2017. The copyright holder for this preprint (which was not certified by peer review) is the author/funder. All rights reserved. No reuse allowed without permission.



**A**

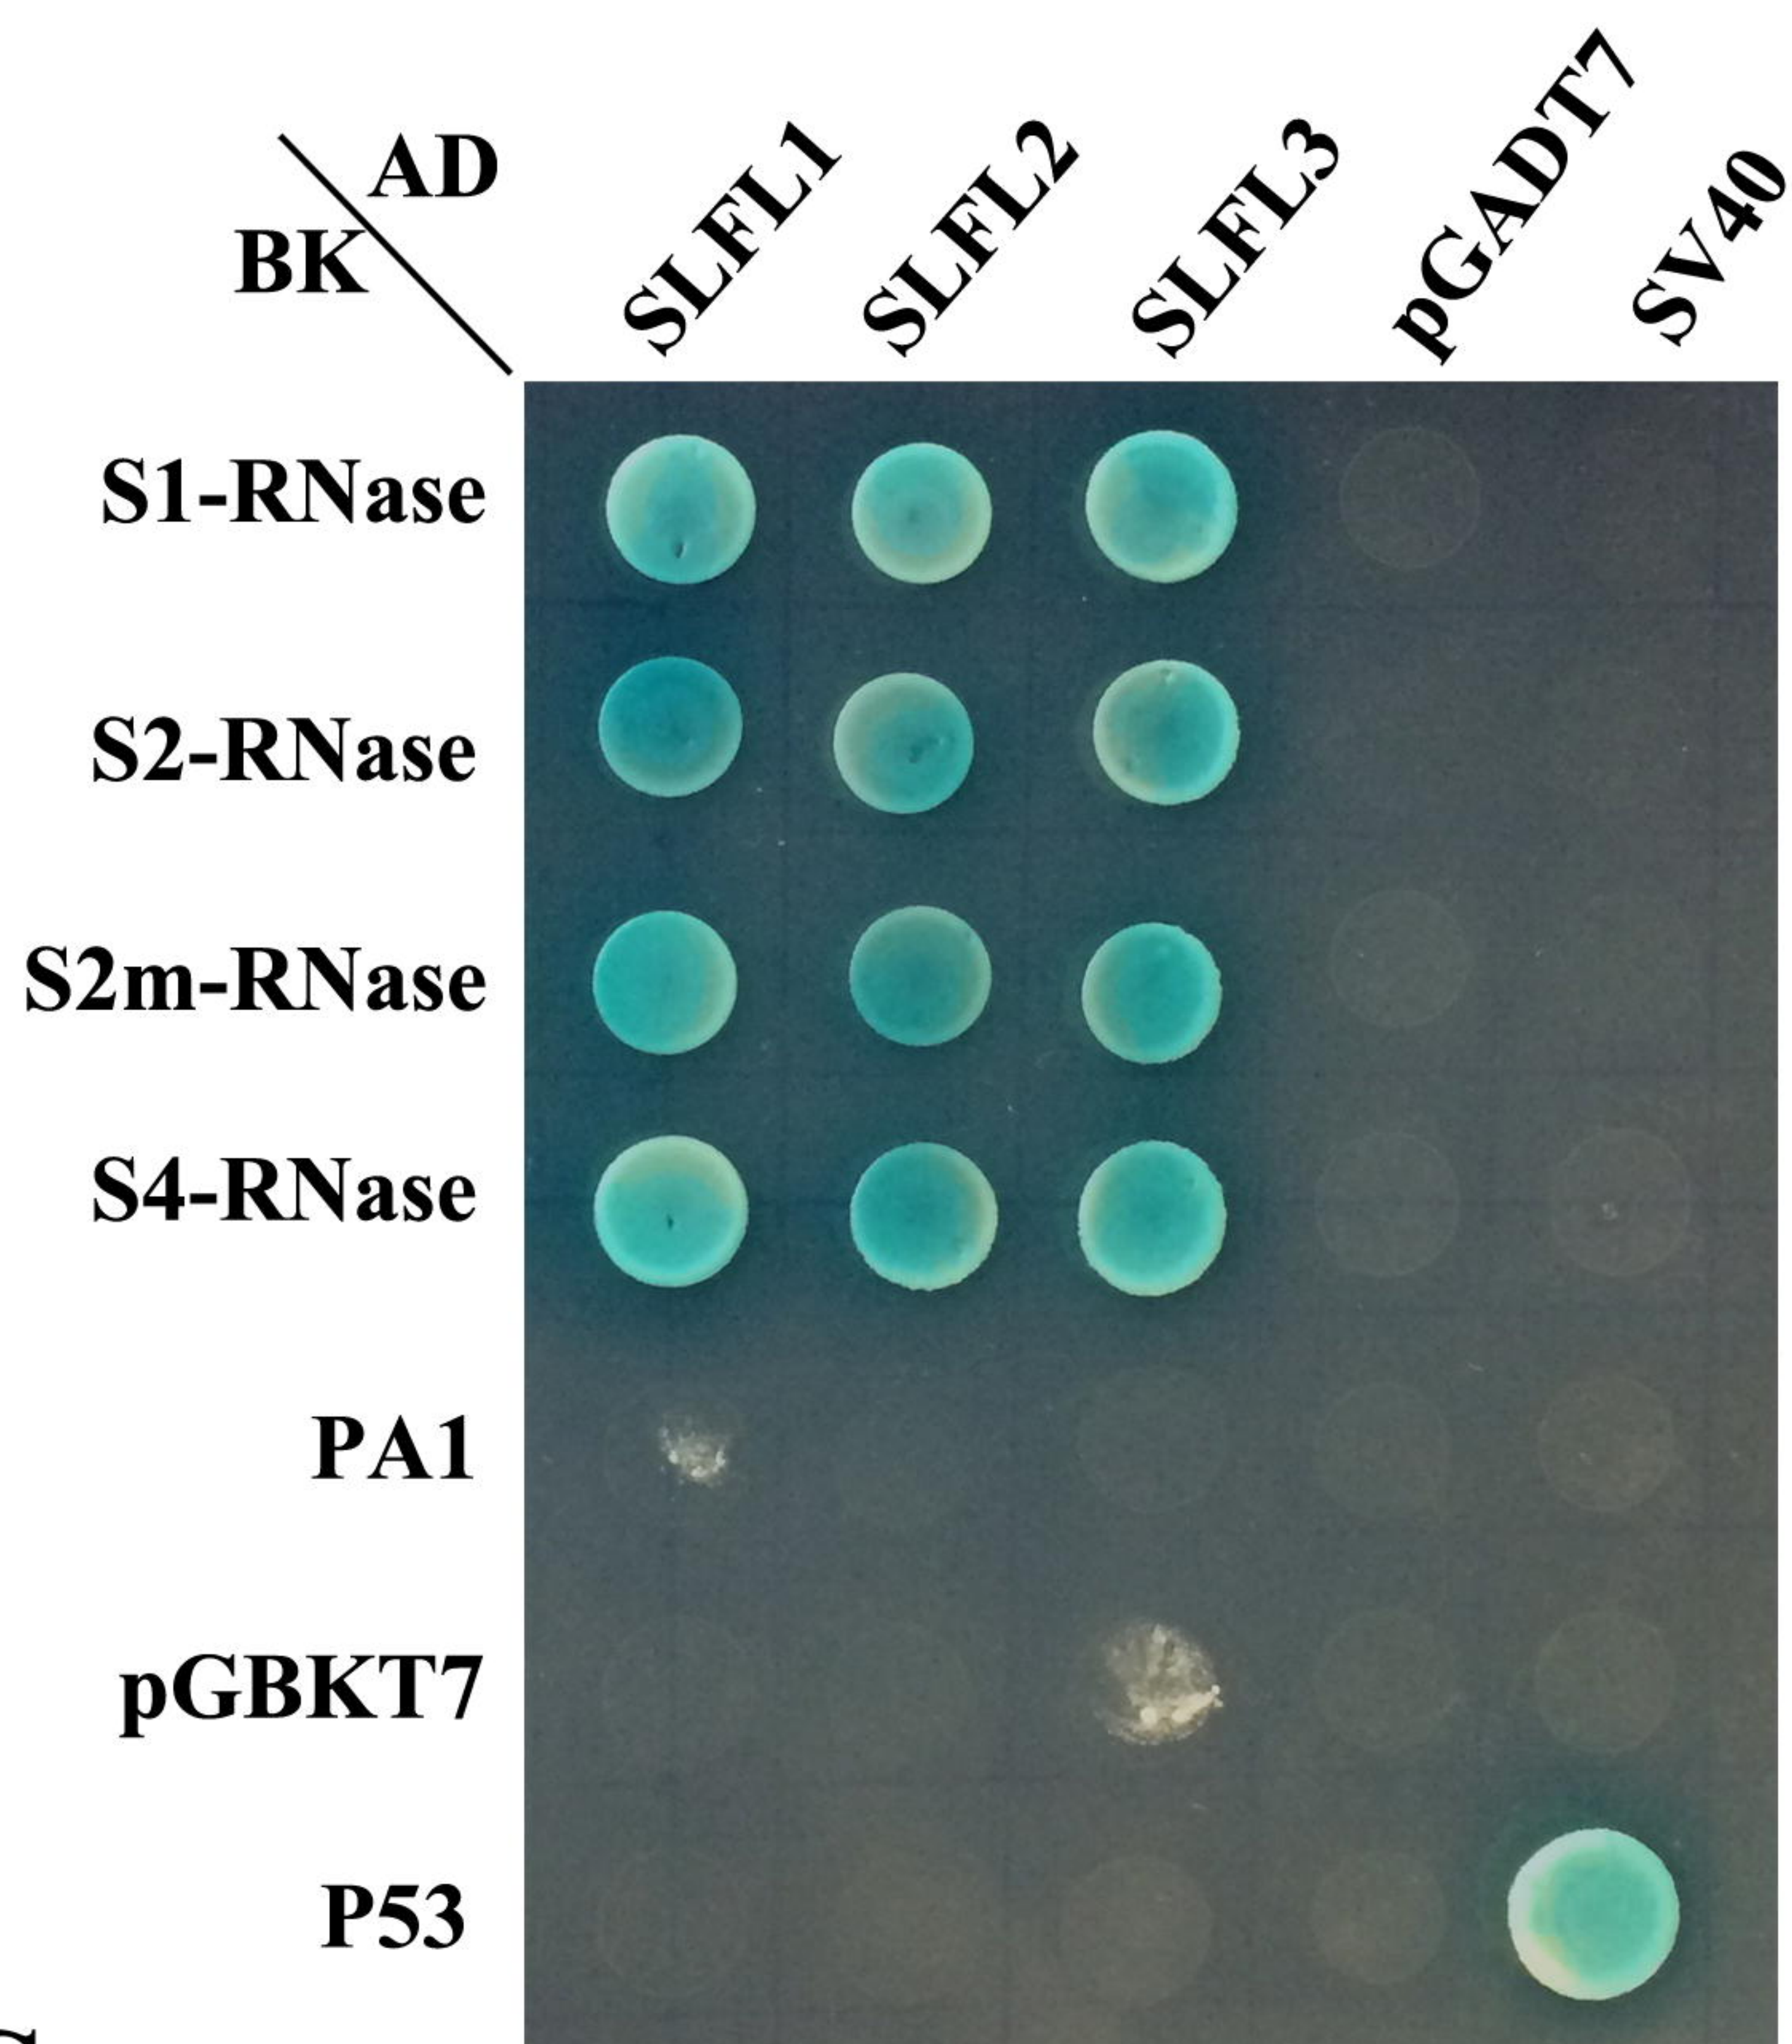

**B**

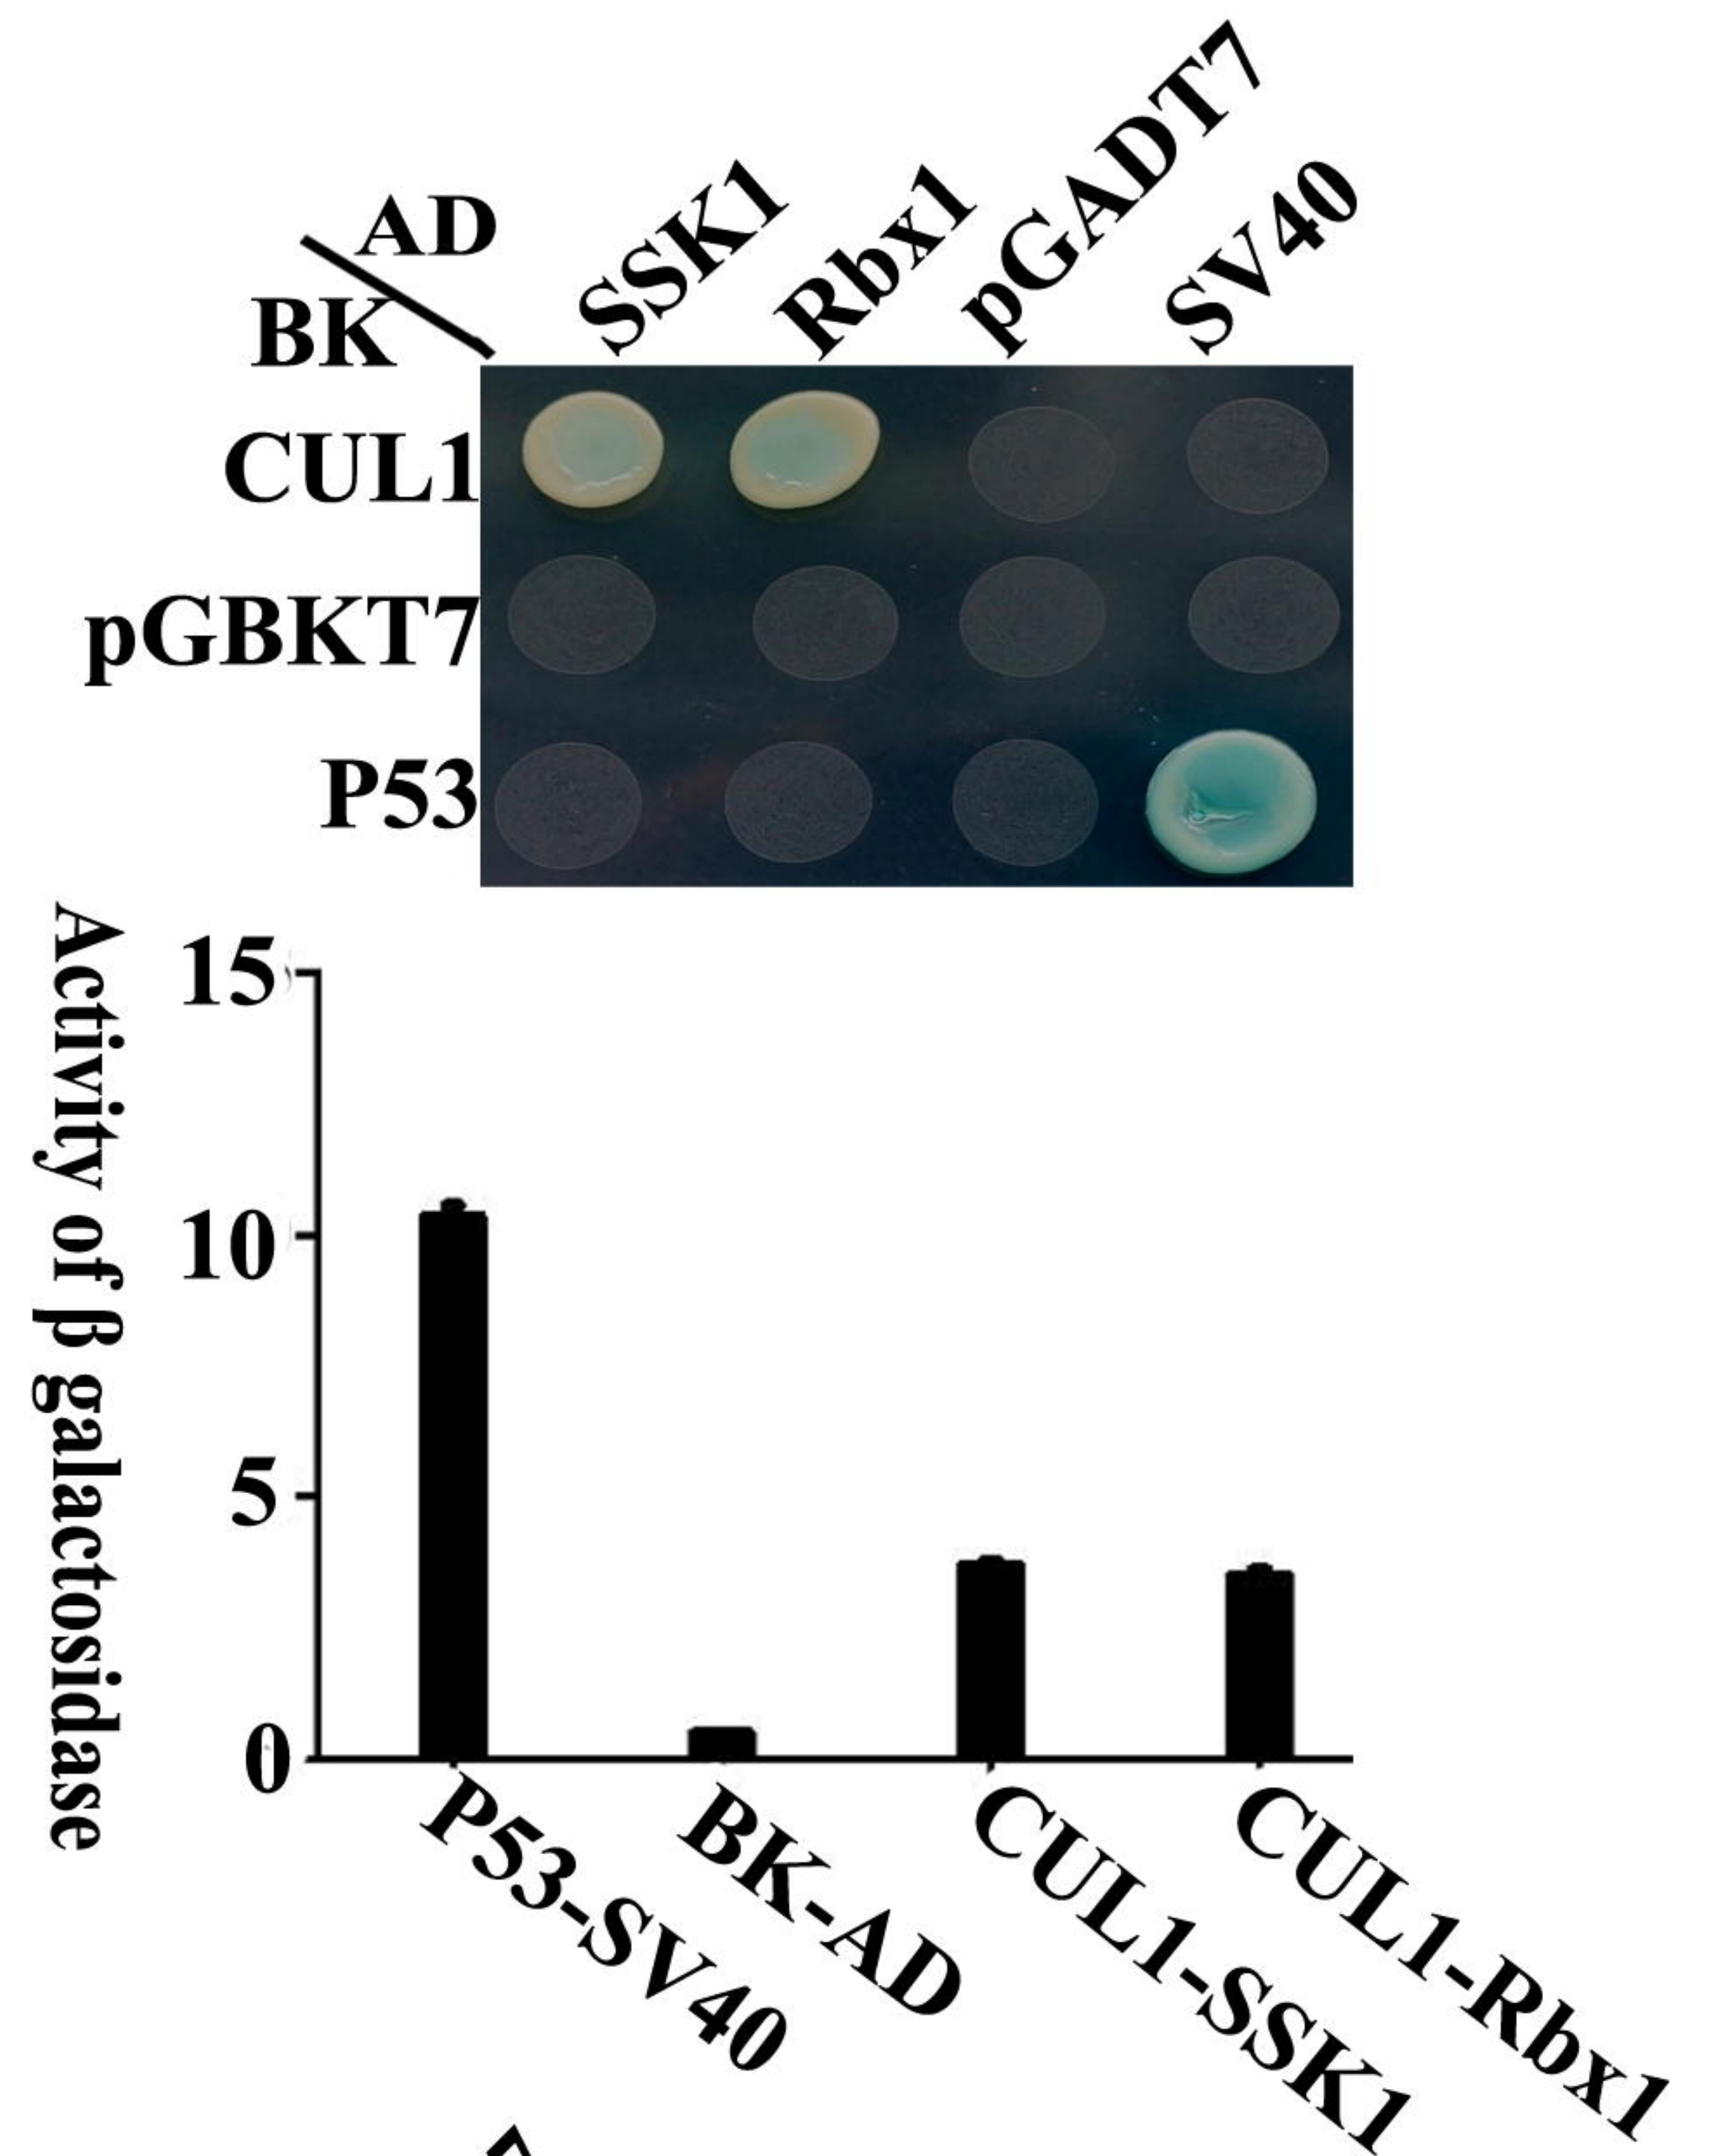

**C**

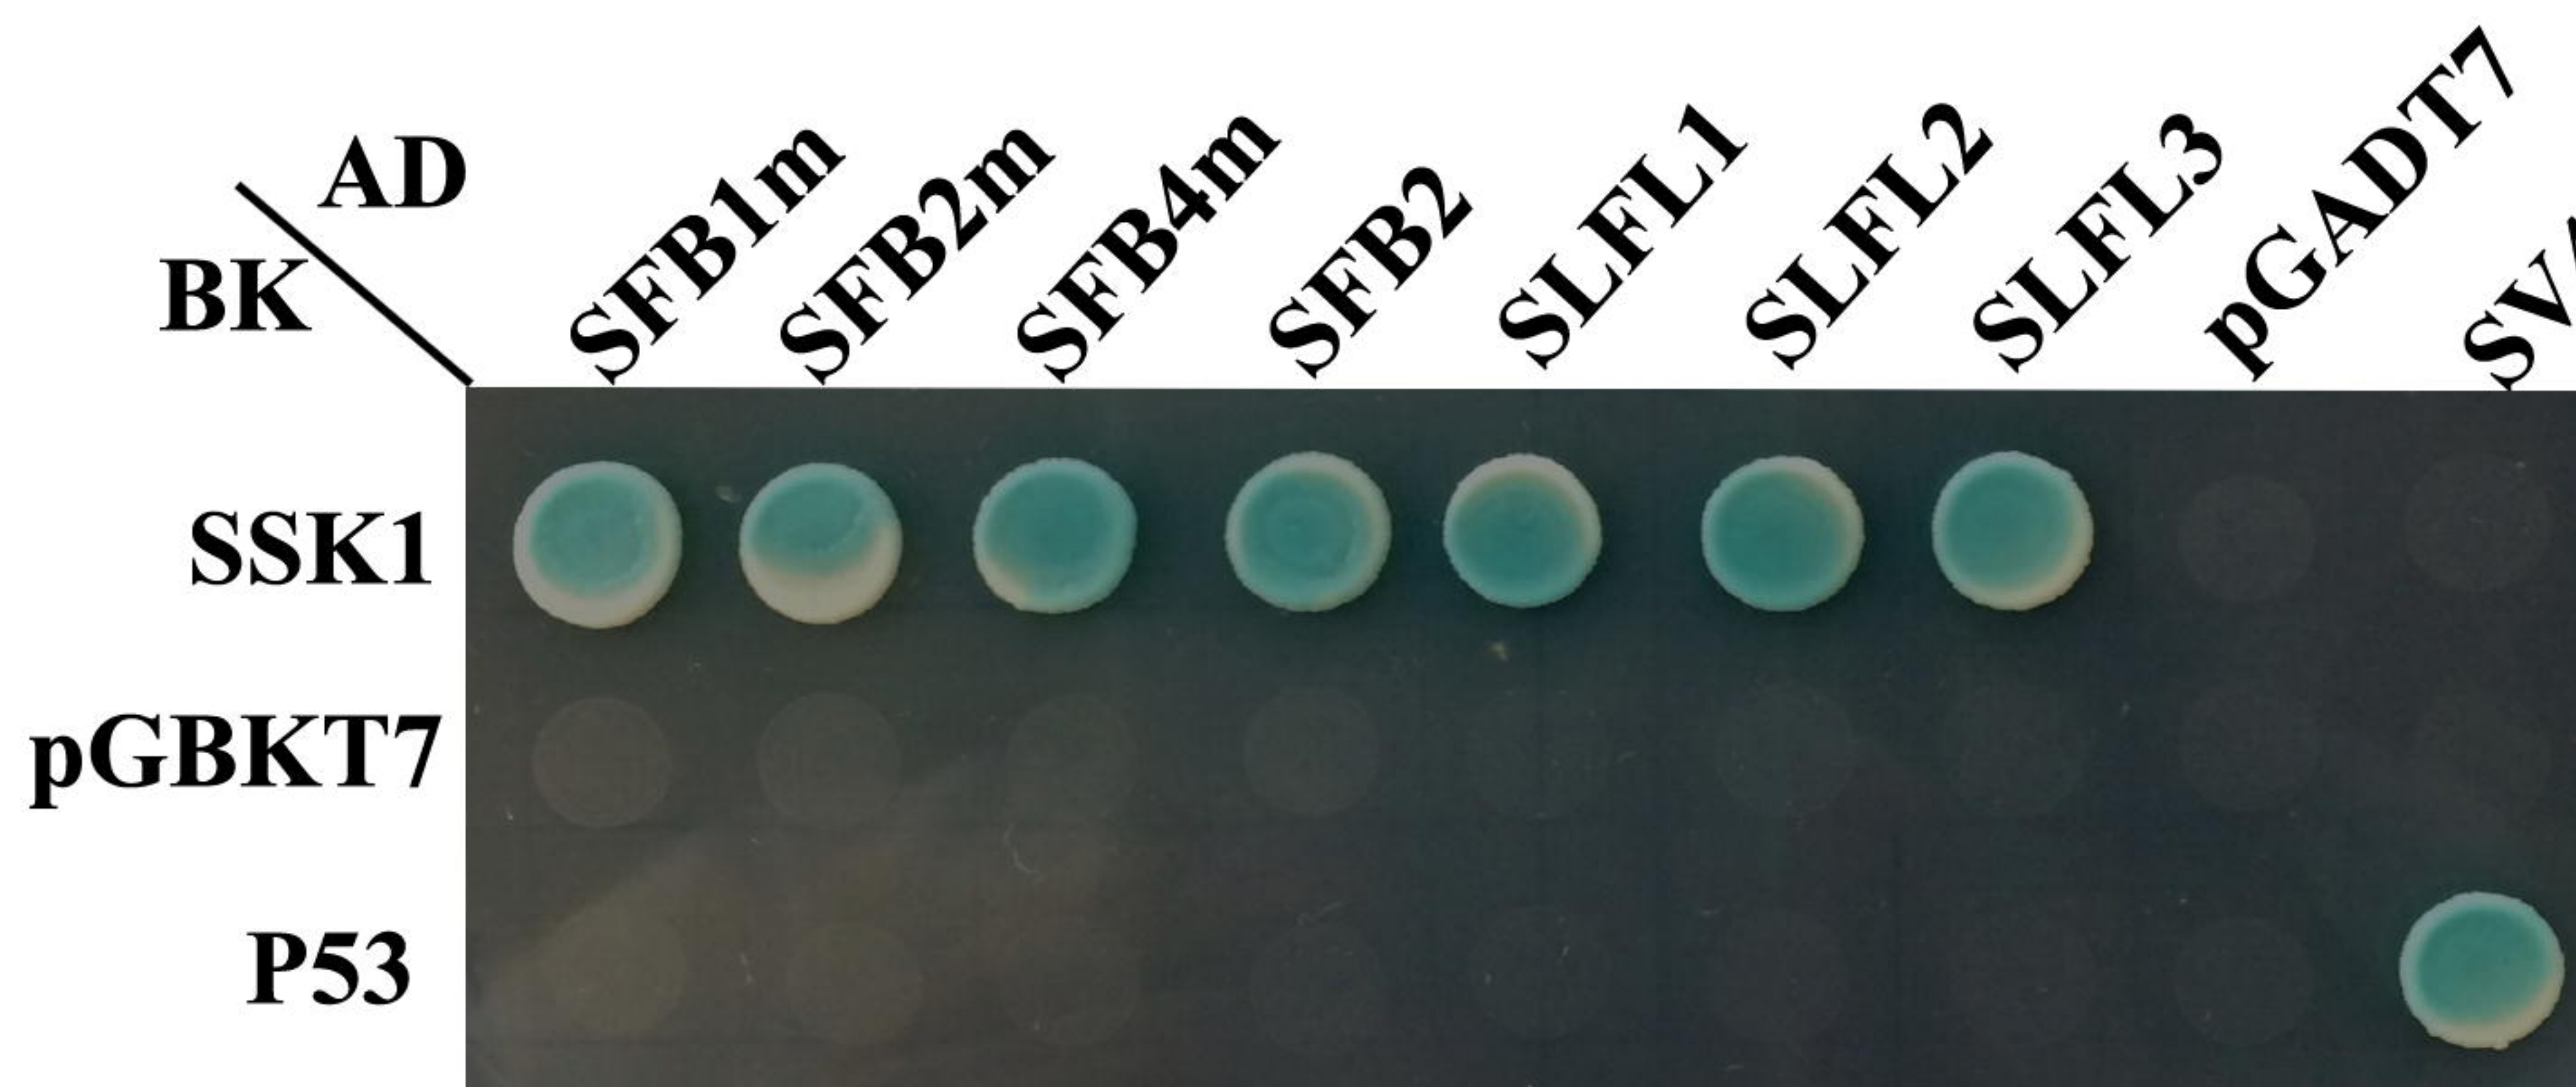

**D**

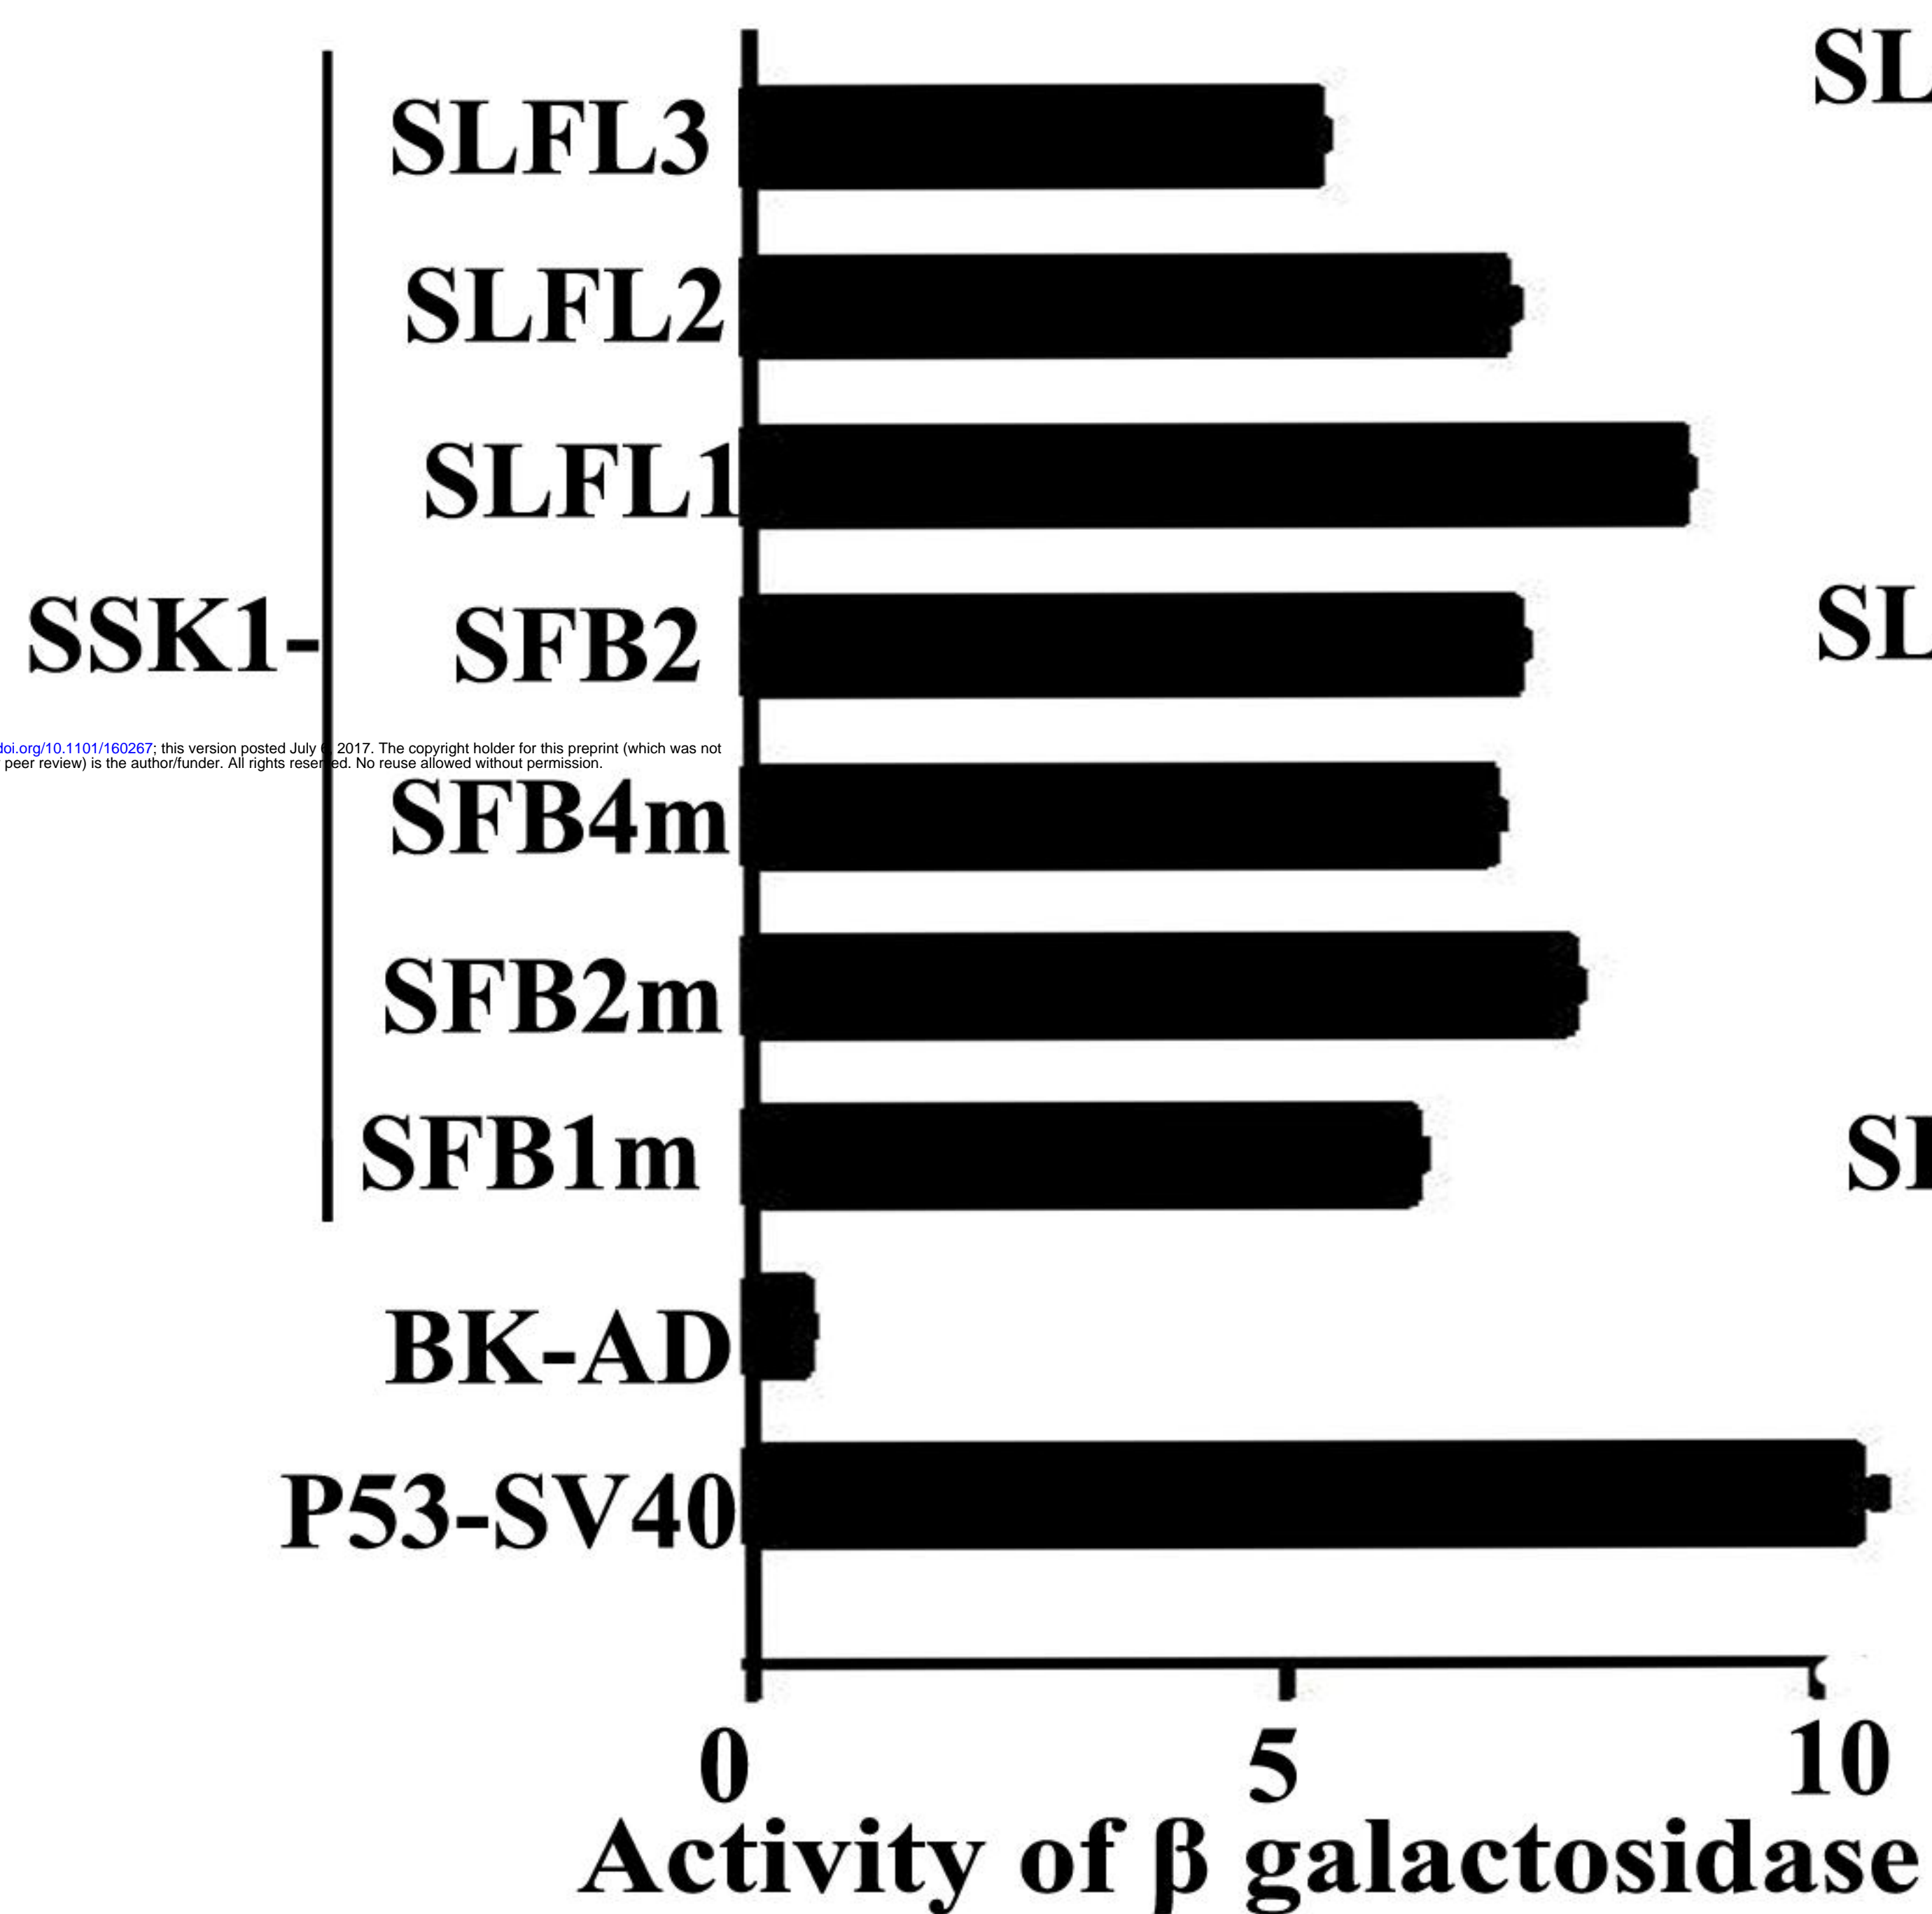

**E**

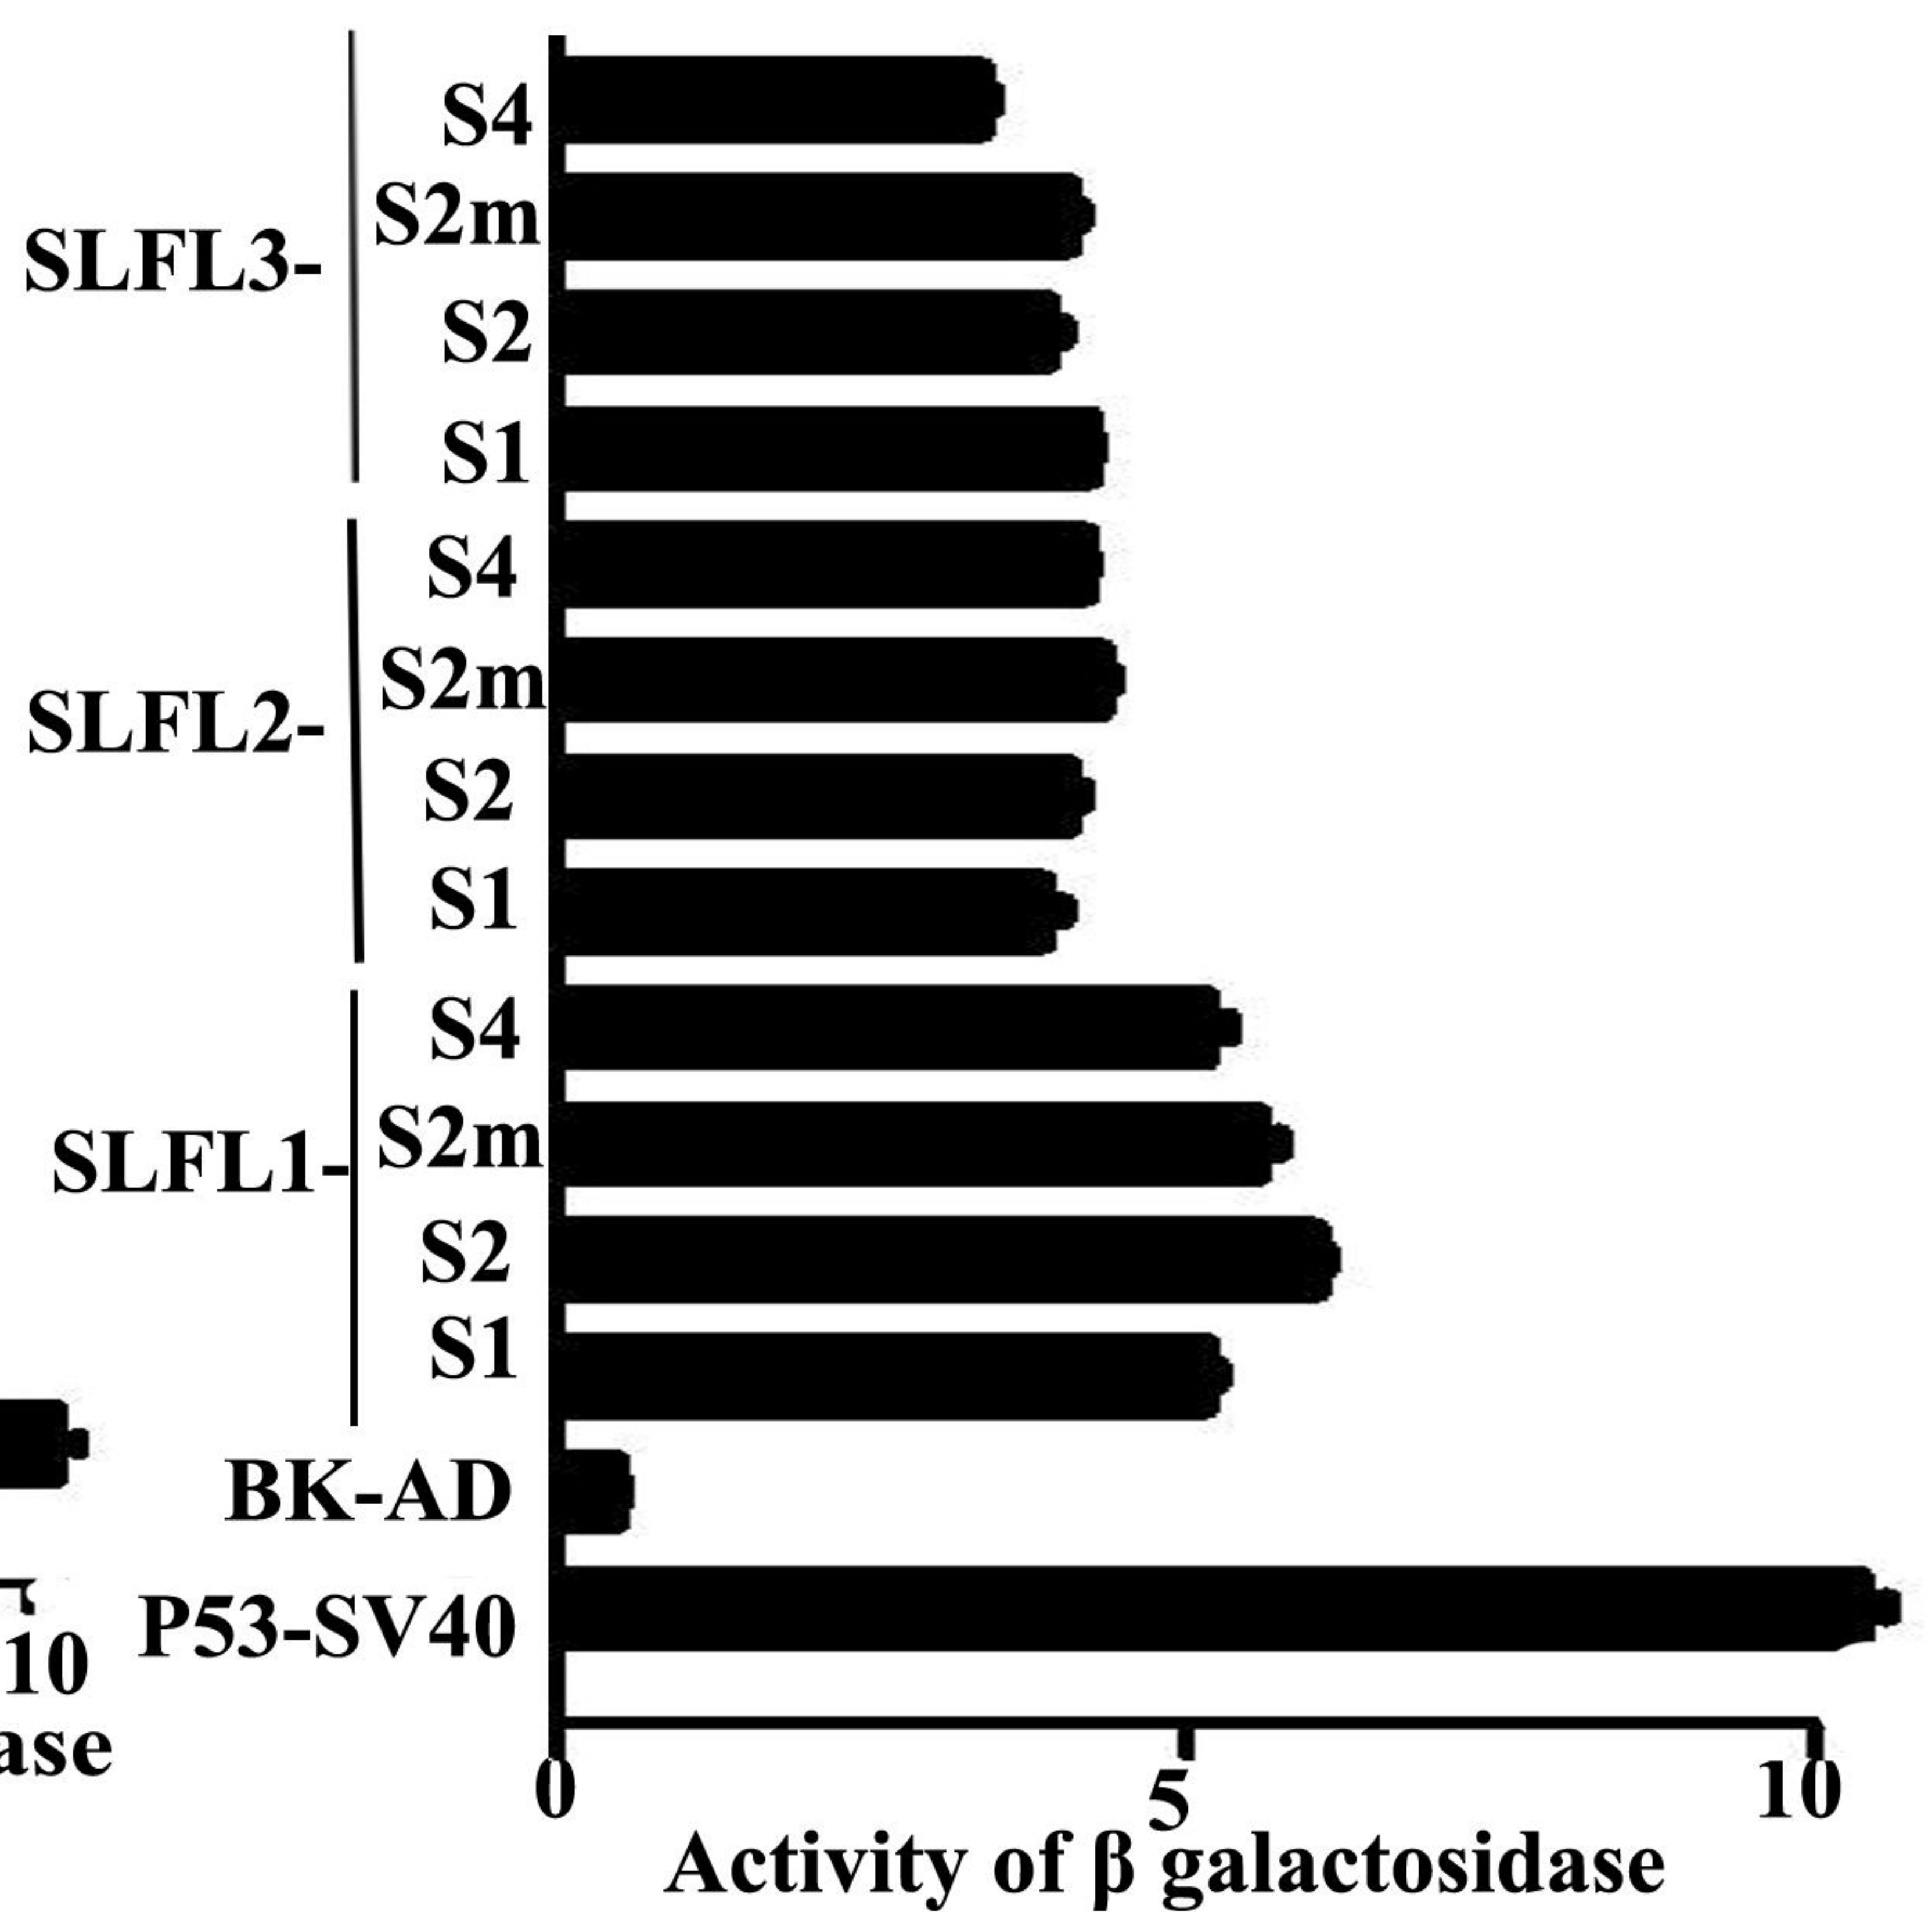



# YFPC

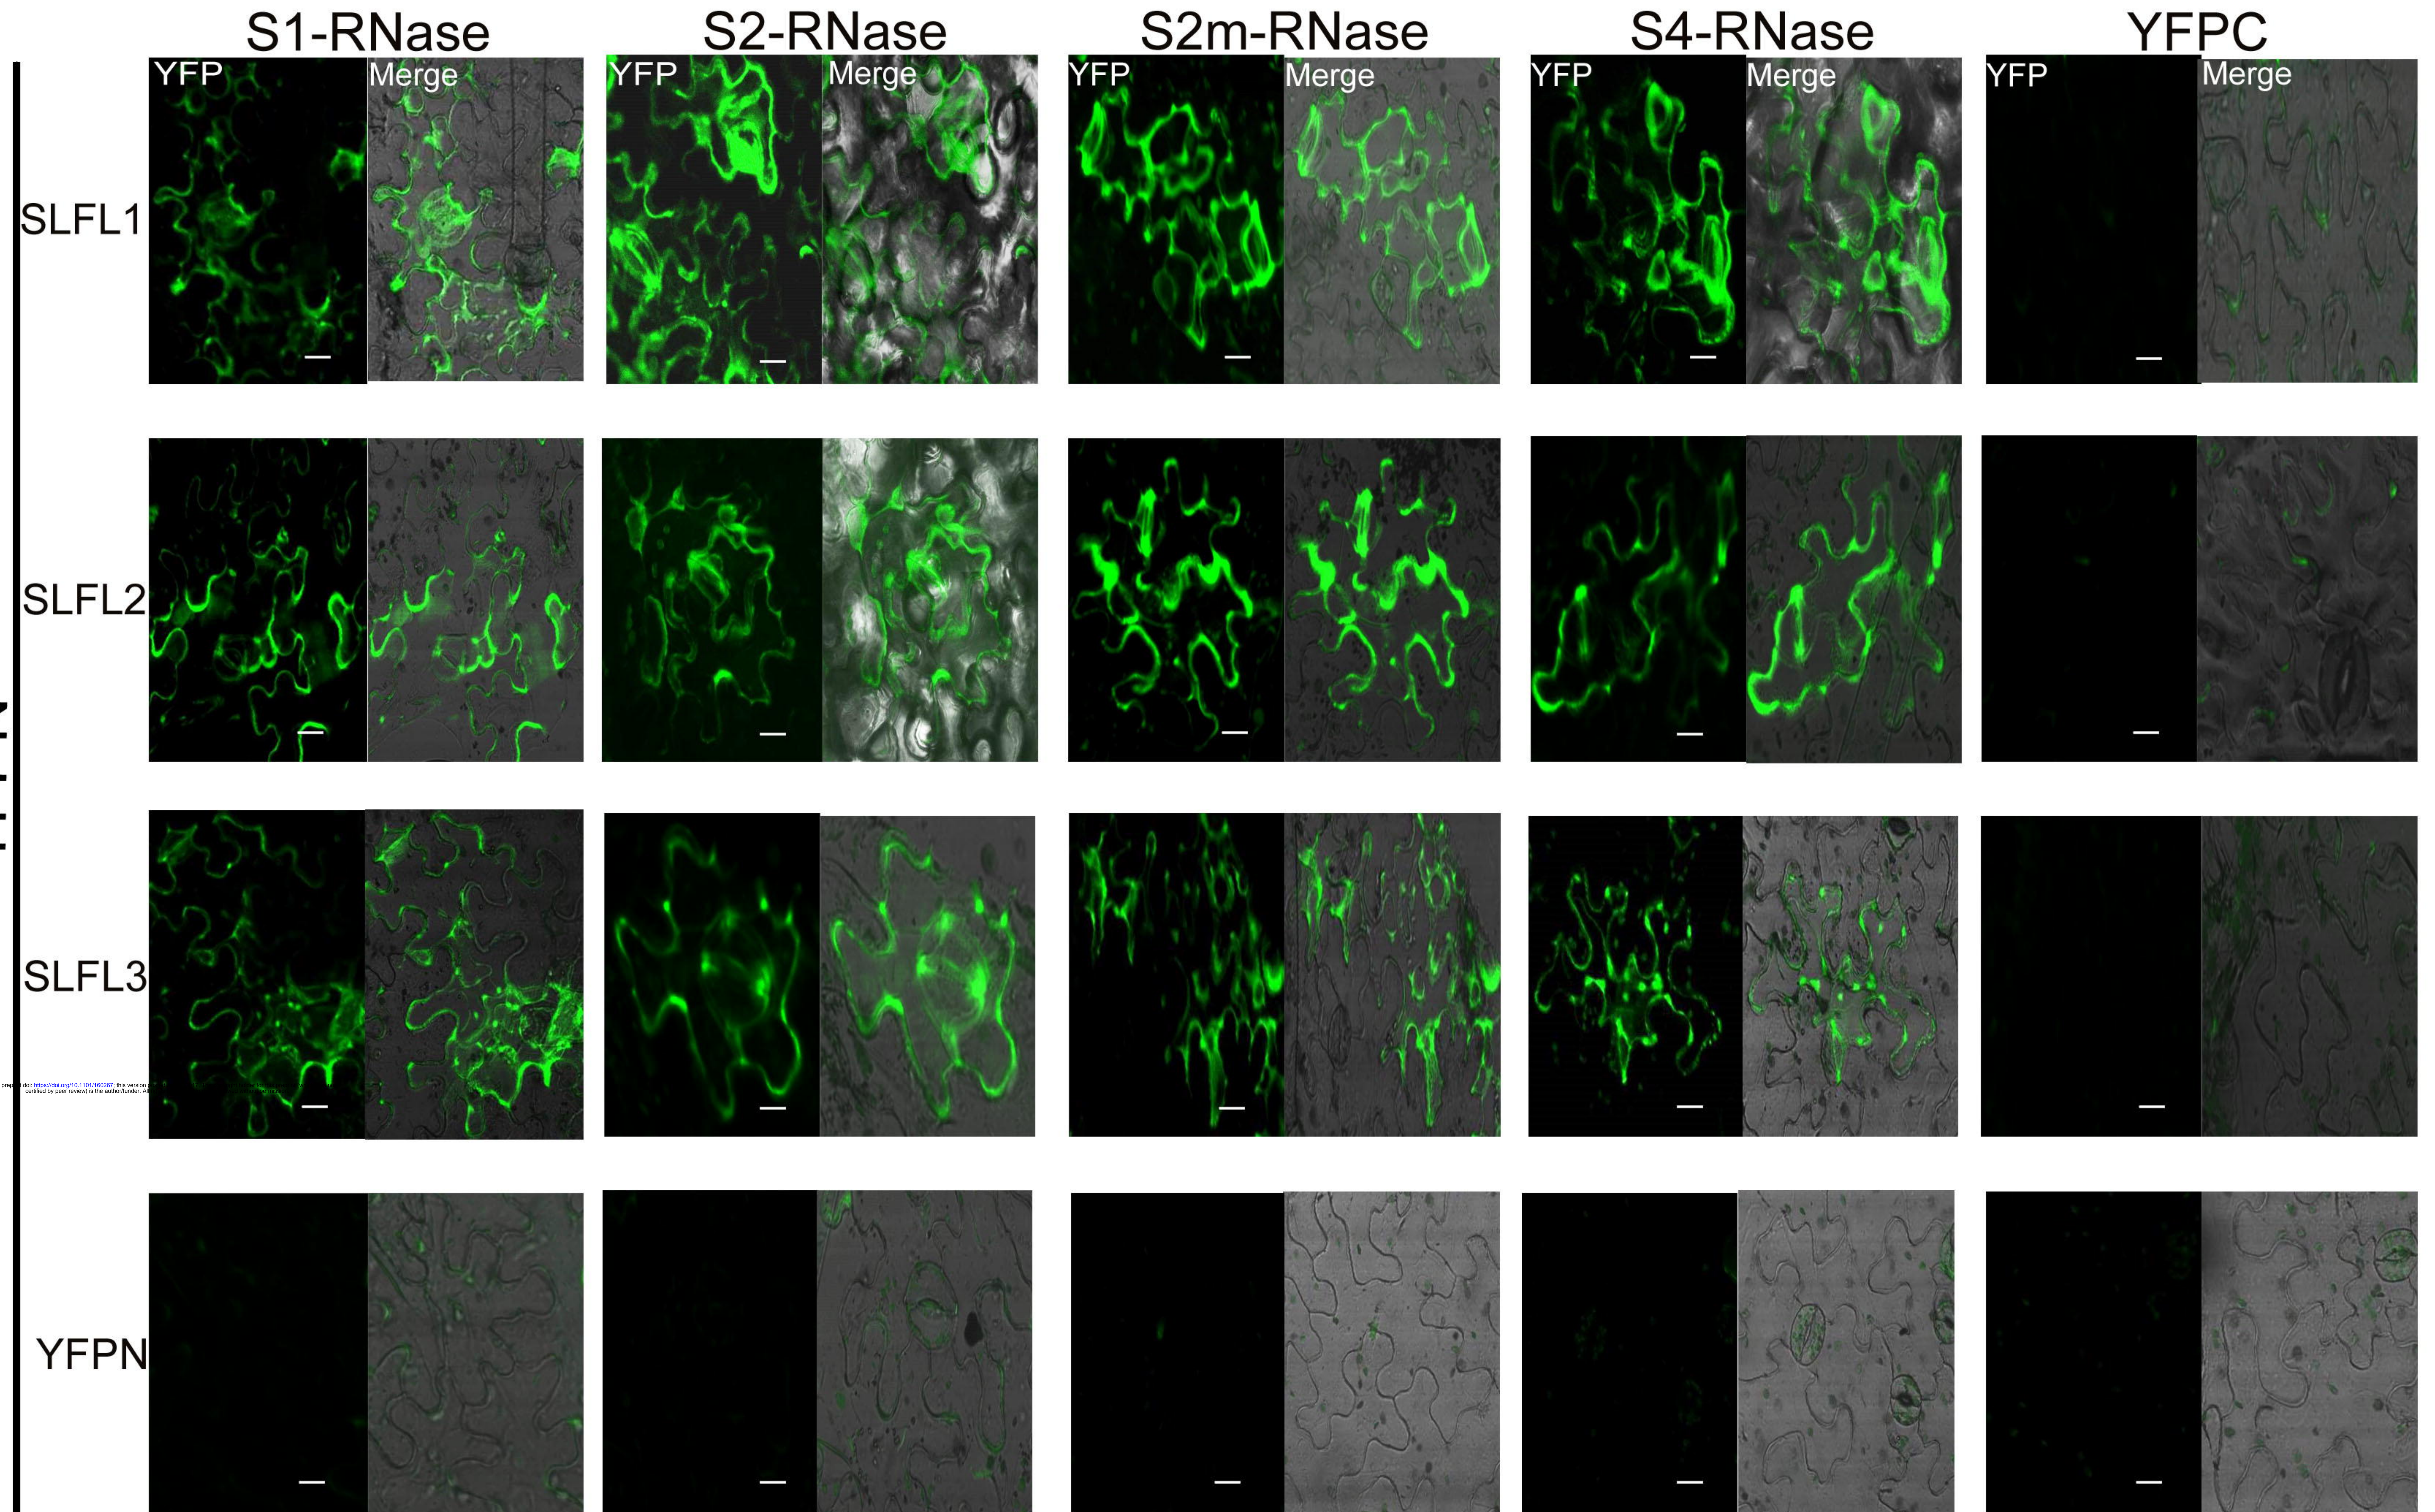

YFPN

bioRxiv preprint doi: <https://doi.org/10.1101/160267>; this version posted April 1, 2017. The copyright holder for this preprint (which was not certified by peer review) is the author/funder, who has granted bioRxiv a license to display the preprint in perpetuity. It is made available under aCC-BY-NC-ND 4.0 International license.



**A**

**Anti-S-RNase**

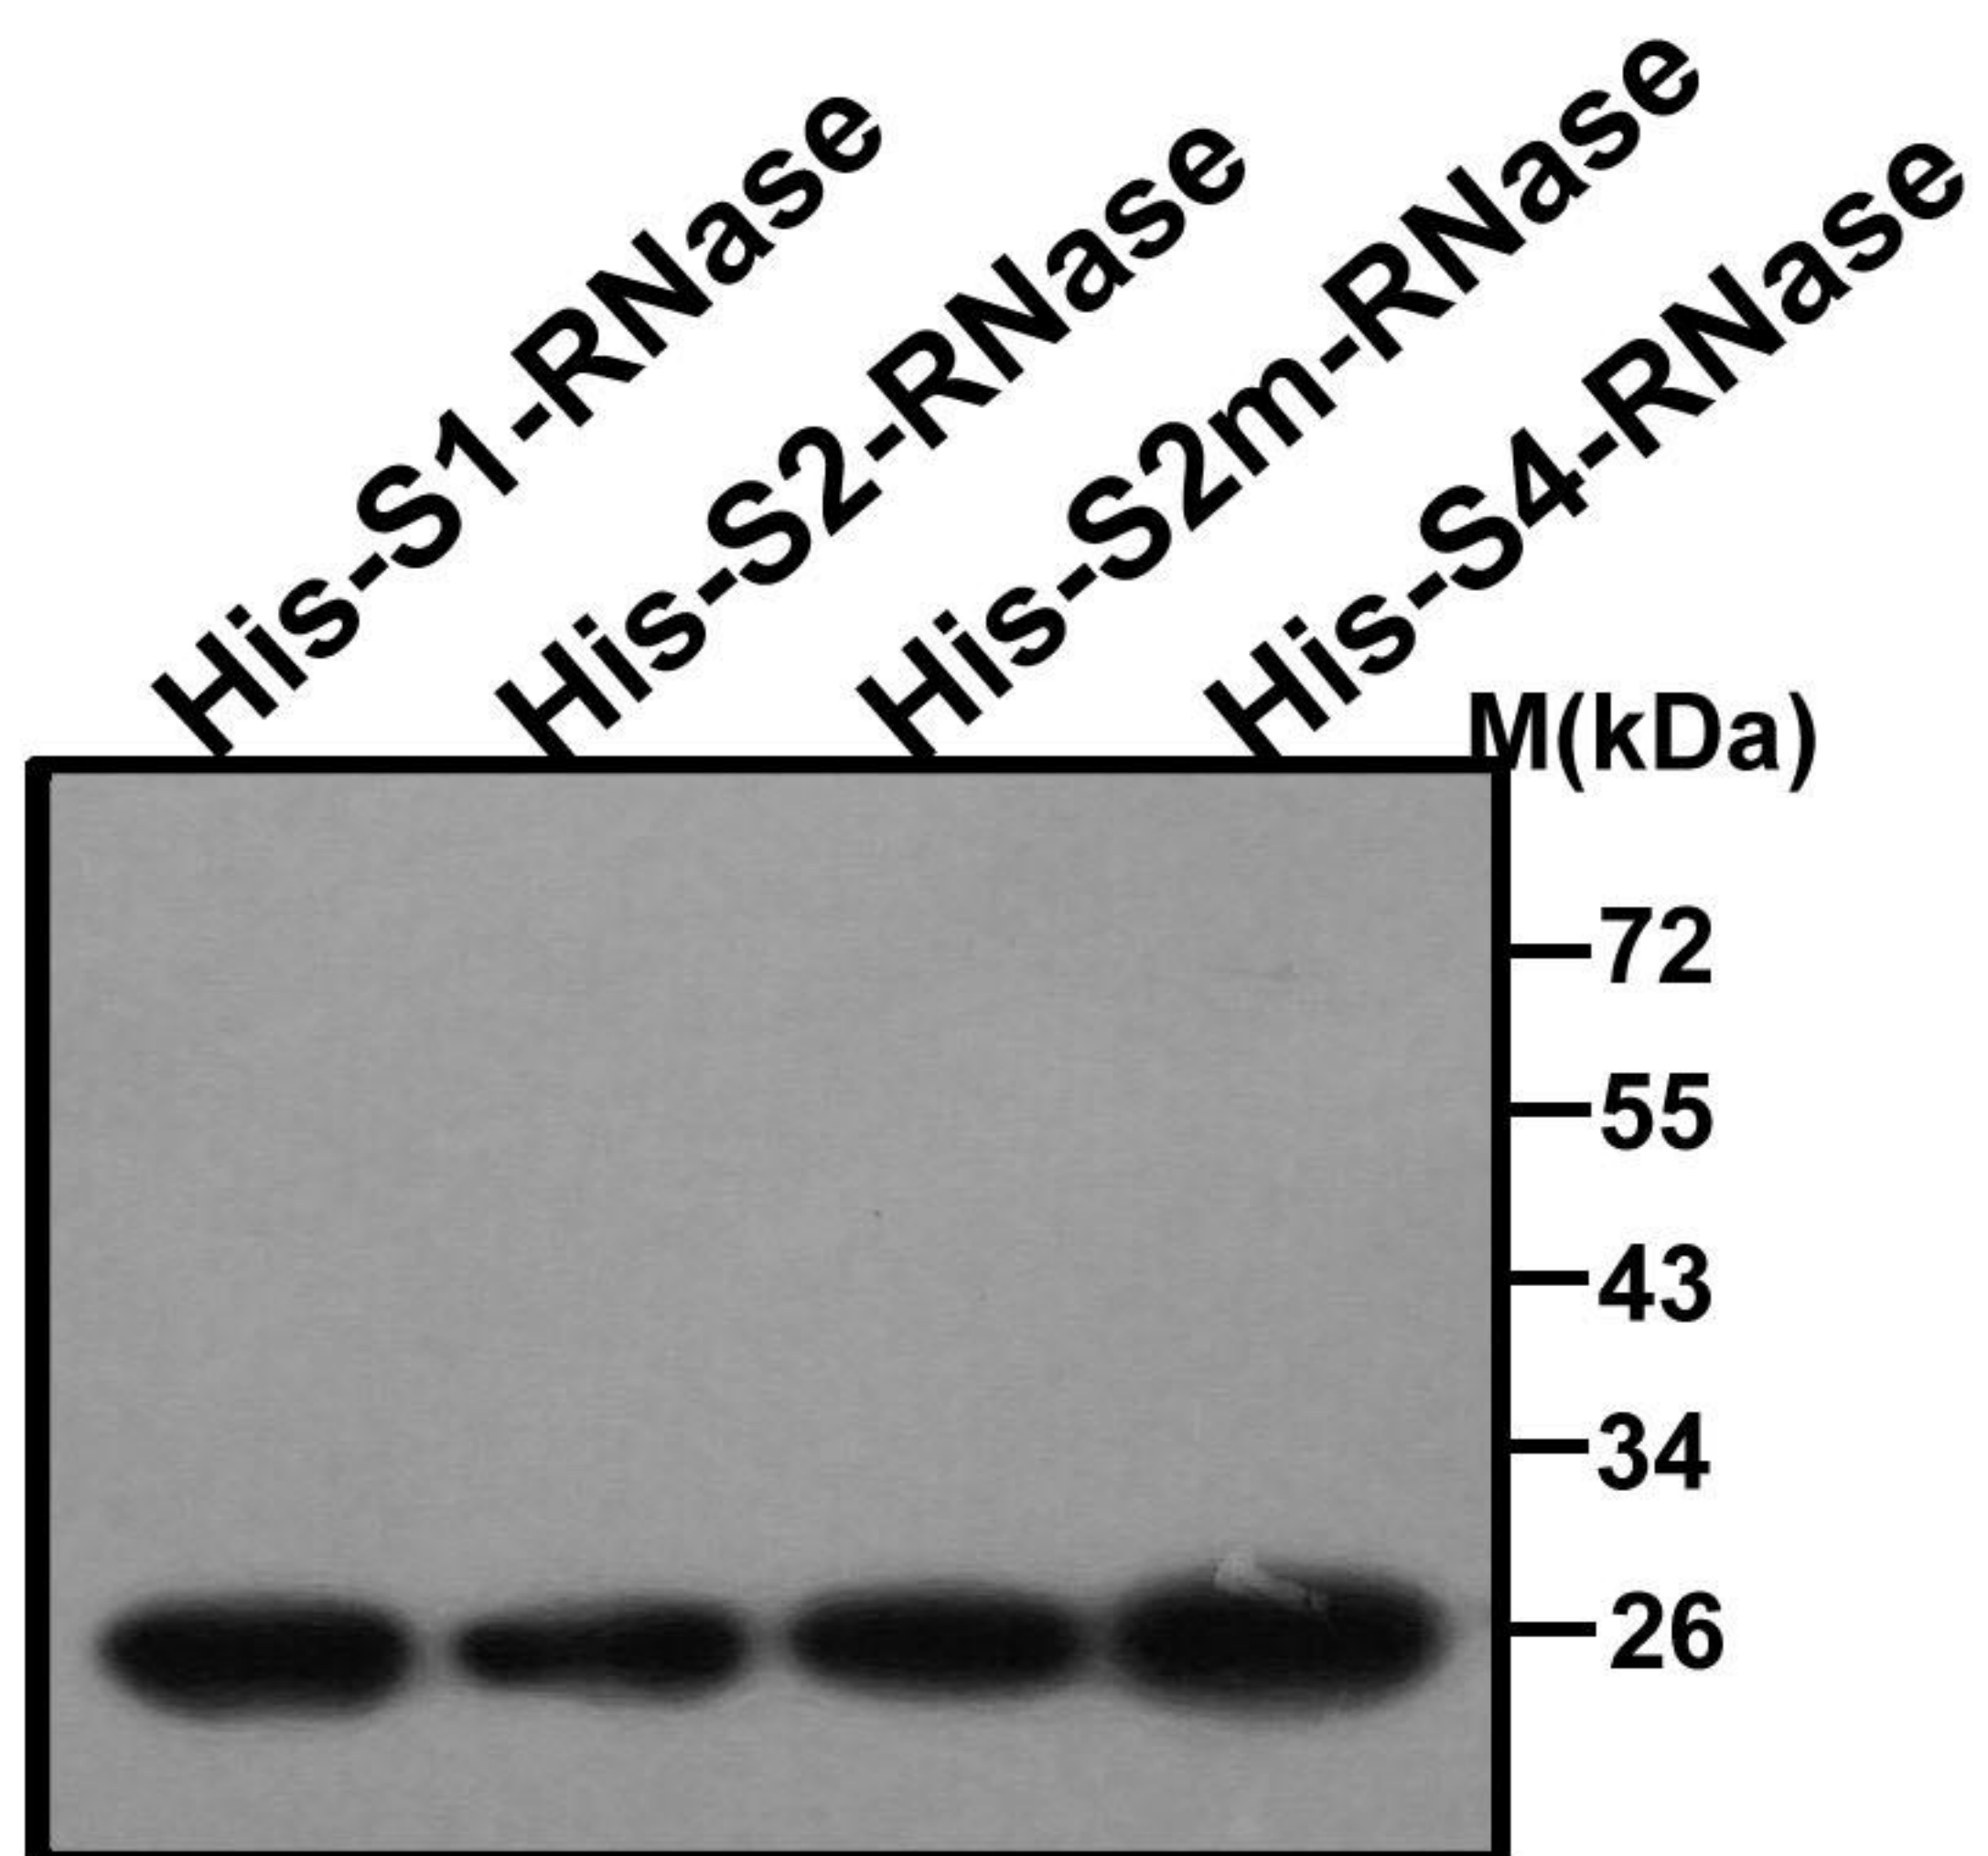

**B**

**Anti-MBP**

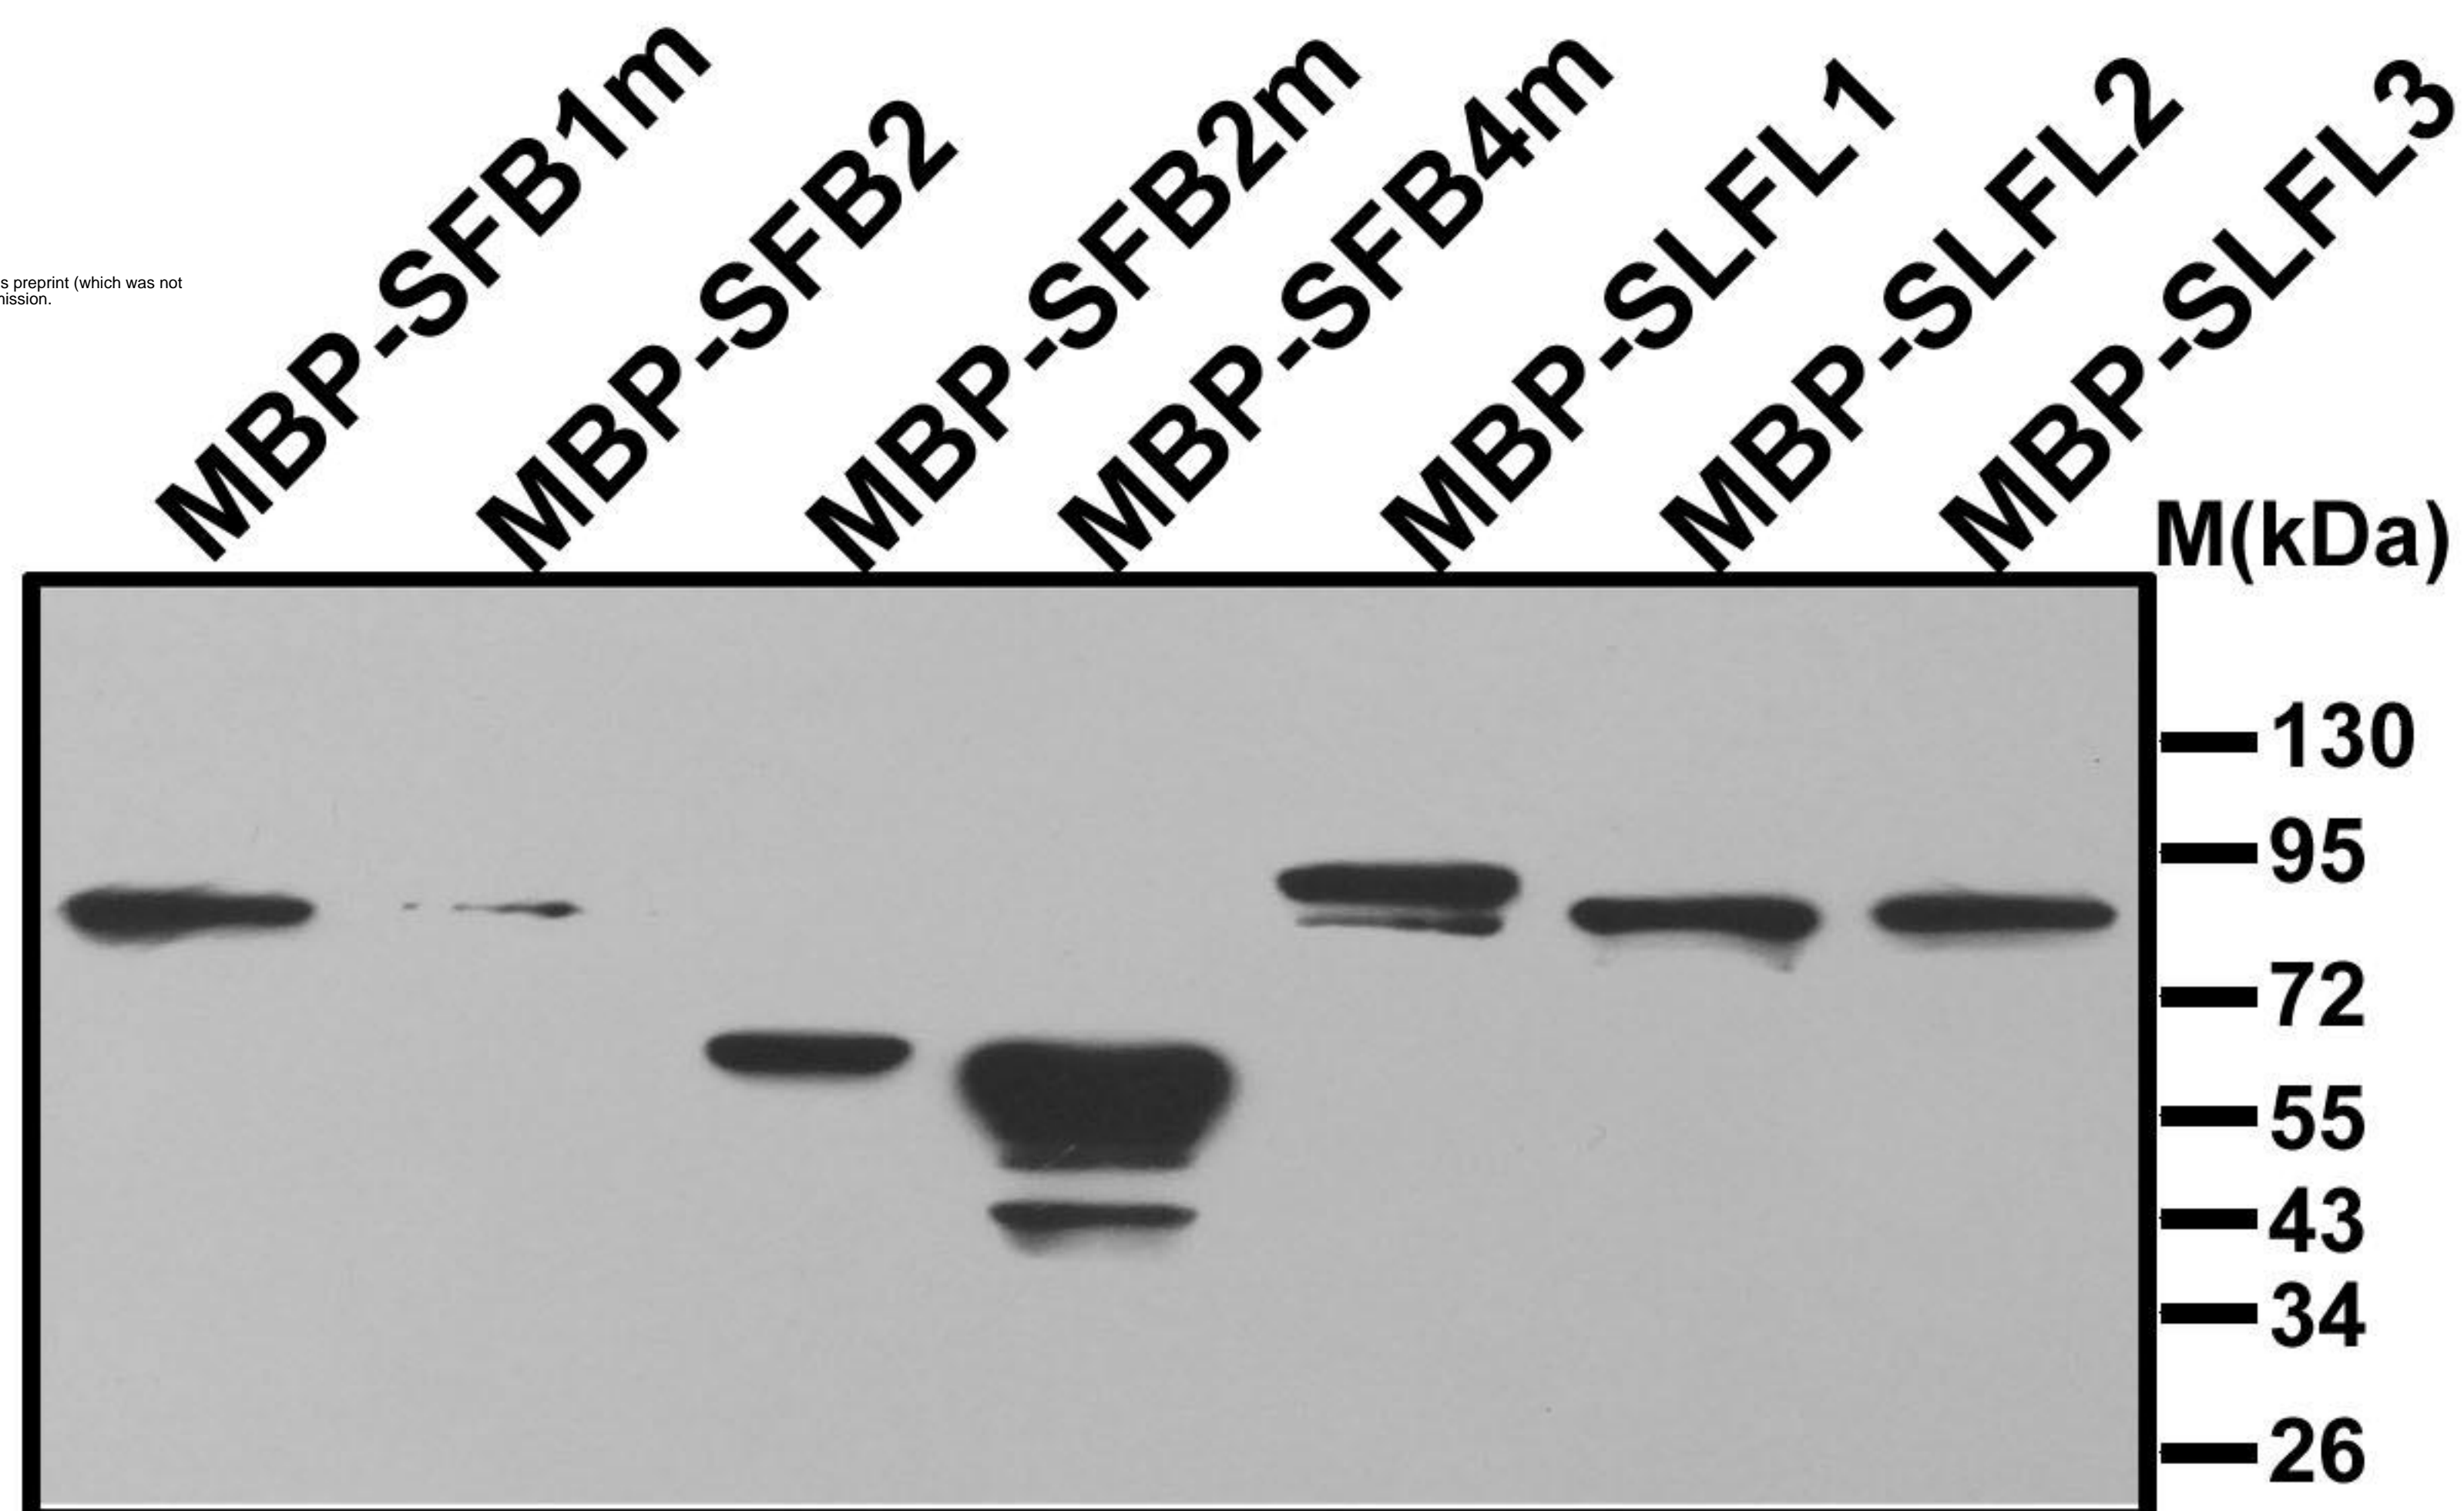



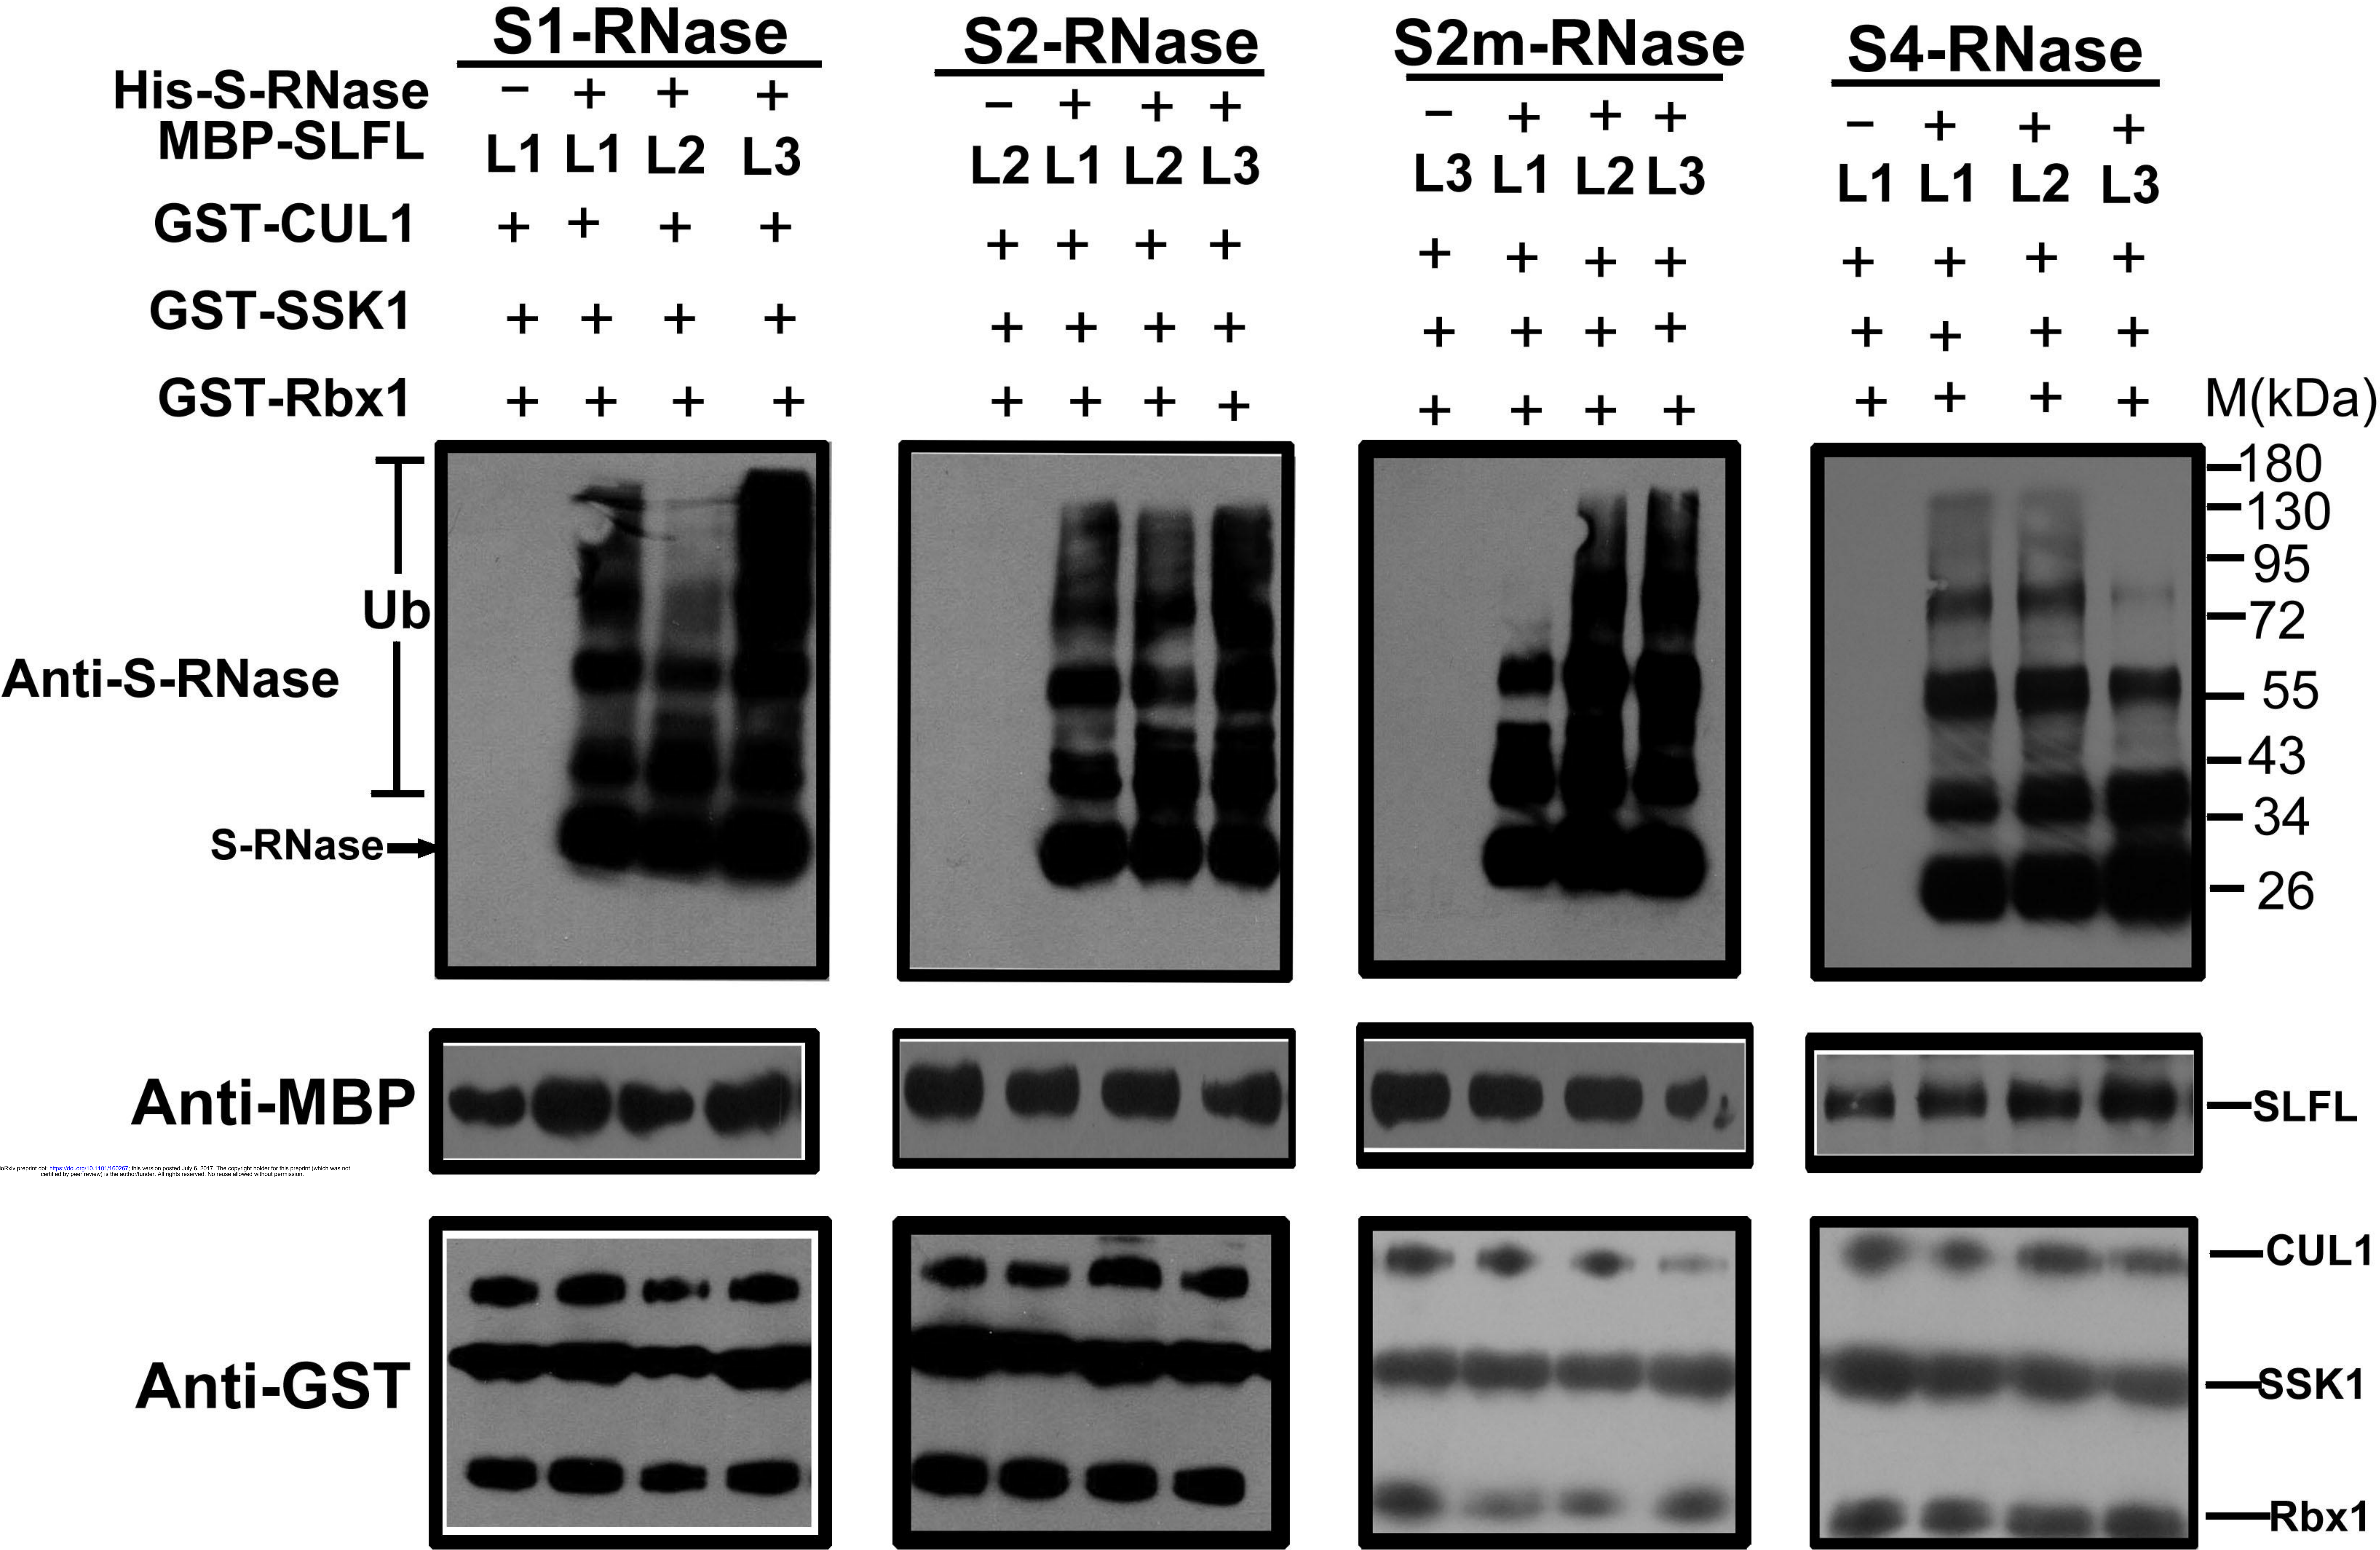

Source: http://www.biorxiv.org/content/10.1101/160267v1.full.pdf
